# Supplementary material for: SALL4‐related gene signature defines a specific stromal subset of pancreatic ductal adenocarcinoma with poor prognostic features
Source: PubMed Central journal article supplement (PMC10323888; doi:10.1002/1878-0261.13370), 2023-01-21
Supplement: MOL2-17-1356-s001.pdf [file MOL2-17-1356-s001.pdf]

## SALL4-related gene signature defines a specific stromal subset of pancreatic ductal adenocarcinoma with poor prognostic features

### SUPPLEMENTARY FIGURES

**Figure S1. Determination of the prognostic threshold to split groups according to *SALL4* expression in pancreatic ductal adenocarcinoma.** **A)** Histograms of the distribution of *SALL4* expression in the ICGC and GSE85916 cohorts. The *SALL4* gene expression assumed a normal distribution and showed no evident cohort-bias clustering. **B)** Kaplan-Meier curves of overall survival for 257 patients with localized pancreatic carcinoma in the ICGC cohort. Groups were split by high (red) or low (blue) levels of *SALL4* expression: median, tertile, quartile, and upper tertile cutoffs.

**Figure S2. The landscape of mutations in pancreatic ductal adenocarcinoma according to *SALL4* expression.** **A)** Color-coded matrix of individual mutations of the genetic and top most mutated genes and for *SALL4* high (left) and *SALL4* low (right) groups, in the ICGC cohort (n=224). **B)** Tumor mutation burden (TMB) for *SALL4* high and *SALL4* low groups (median TMB: 1.06 versus 1.03 mutation/Mb, respectively) in the ICGC cohort compared to different cancer types from TCGA.

**Figure S3. Validation of the phenotype of *SALL4* expression in pancreatic ductal adenocarcinoma.** **A)** Boxplots and barplots comparing the distribution of the *SALL4* expression in subtypes from molecular classifications (Moffitt *et al* and Puleo *et al*) in the TCGA cohort. **B)** Boxplots comparing the distribution of the fibroblast signature to the *SALL4* expression in TCGA and GSE85916 cohorts. **C)** Boxplots comparing the distribution of the stem cell signature to the *SALL4* expression in the TCGA and GSE85916 cohorts. **D)** Boxplots and barplots comparing the distribution of the *SALL4* expression in different subtypes from CAF classification (Neuzillet *et al*) in the ICGC cohort. **E)** Boxplots comparing the distribution of the F-TBRS and TGF $\beta$  CAF signatures to the *SALL4* expression in TCGA and GSE85916 cohorts. Boxplots show the median and interquartile range. Medians were compared using Student's t-tests.

**Figure S4. Validation of the *SALL4* signature.** **A)** Heatmaps visualizing the relative average expression of indicated genes (rows) according to *SALL4* expression for patients with localized pancreatic carcinoma in the TCGA and GSE85916 cohorts. **B)** Boxplots comparing the distribution of the immune MCP-counter signatures to the *SALL4* expression in the ICGC cohort. Boxplots show the median and interquartile range. Medians were compared using Student's t-tests. **C)** Correlation matrix showing Pearson's correlation coefficients from comparisons between genes of the *SALL4* signature and MCP-counter signatures in the TCGA and GSE85916 cohorts. **D)** Signature-by signature correlation matrix visualizing the pairwise Pearson's correlation coefficients in the ICGC, TCGA and GSE85916 cohorts.

**Figure S5. Molecular pathways and functionality of *SALL4*-expressing fibroblasts.** **A)** Protein expression of *SALL4* isoforms (*SALL4A*: 165 kDa; *SALL4B*: 95 kDa) evaluated in the same culture condition, with Actin used as an internal control in MRC5<sup>ctrl</sup> and MRC5<sup>*SALL4*</sup> using lentivirus-mediated

transduction for one of a representative experiment. **B)** Number of colony formation with Colo320 ± MRC5 with or without SALL4 transduction using soft agar colony formation assay (Data are displayed as mean ± standard deviation; scale bars, 200 μm). One representative experiment is shown (n=3). **C)** Representative image of a spheroid with Panc-1 and MRC5 with or without SALL4 transduction (Day-4; scale bars, 200 μm).

**Figure S6. Evaluation of stromal signature in immunochemistry. A)** Heatmaps visualizing the relative pairwise Pearson's correlation coefficients between the 24 genes associated with *SALL4* expression in the ICGC, TCGA, and GSE85916 cohorts. **B)** Kaplan-Meier curves of overall survival according to 7-genes signature expression (best cutoff), compared using the log-rank test, in ICGC and GSE85916 cohorts. **C)** Heatmaps visualizing the relative average expression of indicated genes (rows) according to patients' survival from 22 localized pancreatic carcinomas from Nanostring analysis (top). Boxplots comparing the distribution of the 24-gene and 7-gene signatures to patients' survival in the same cohort (bottom). Boxplots show the median and interquartile range. Medians were compared using Student's t-tests. **D)** Semi-quantitative scale used to evaluate PTK7 in stromal cells.

Figure S1

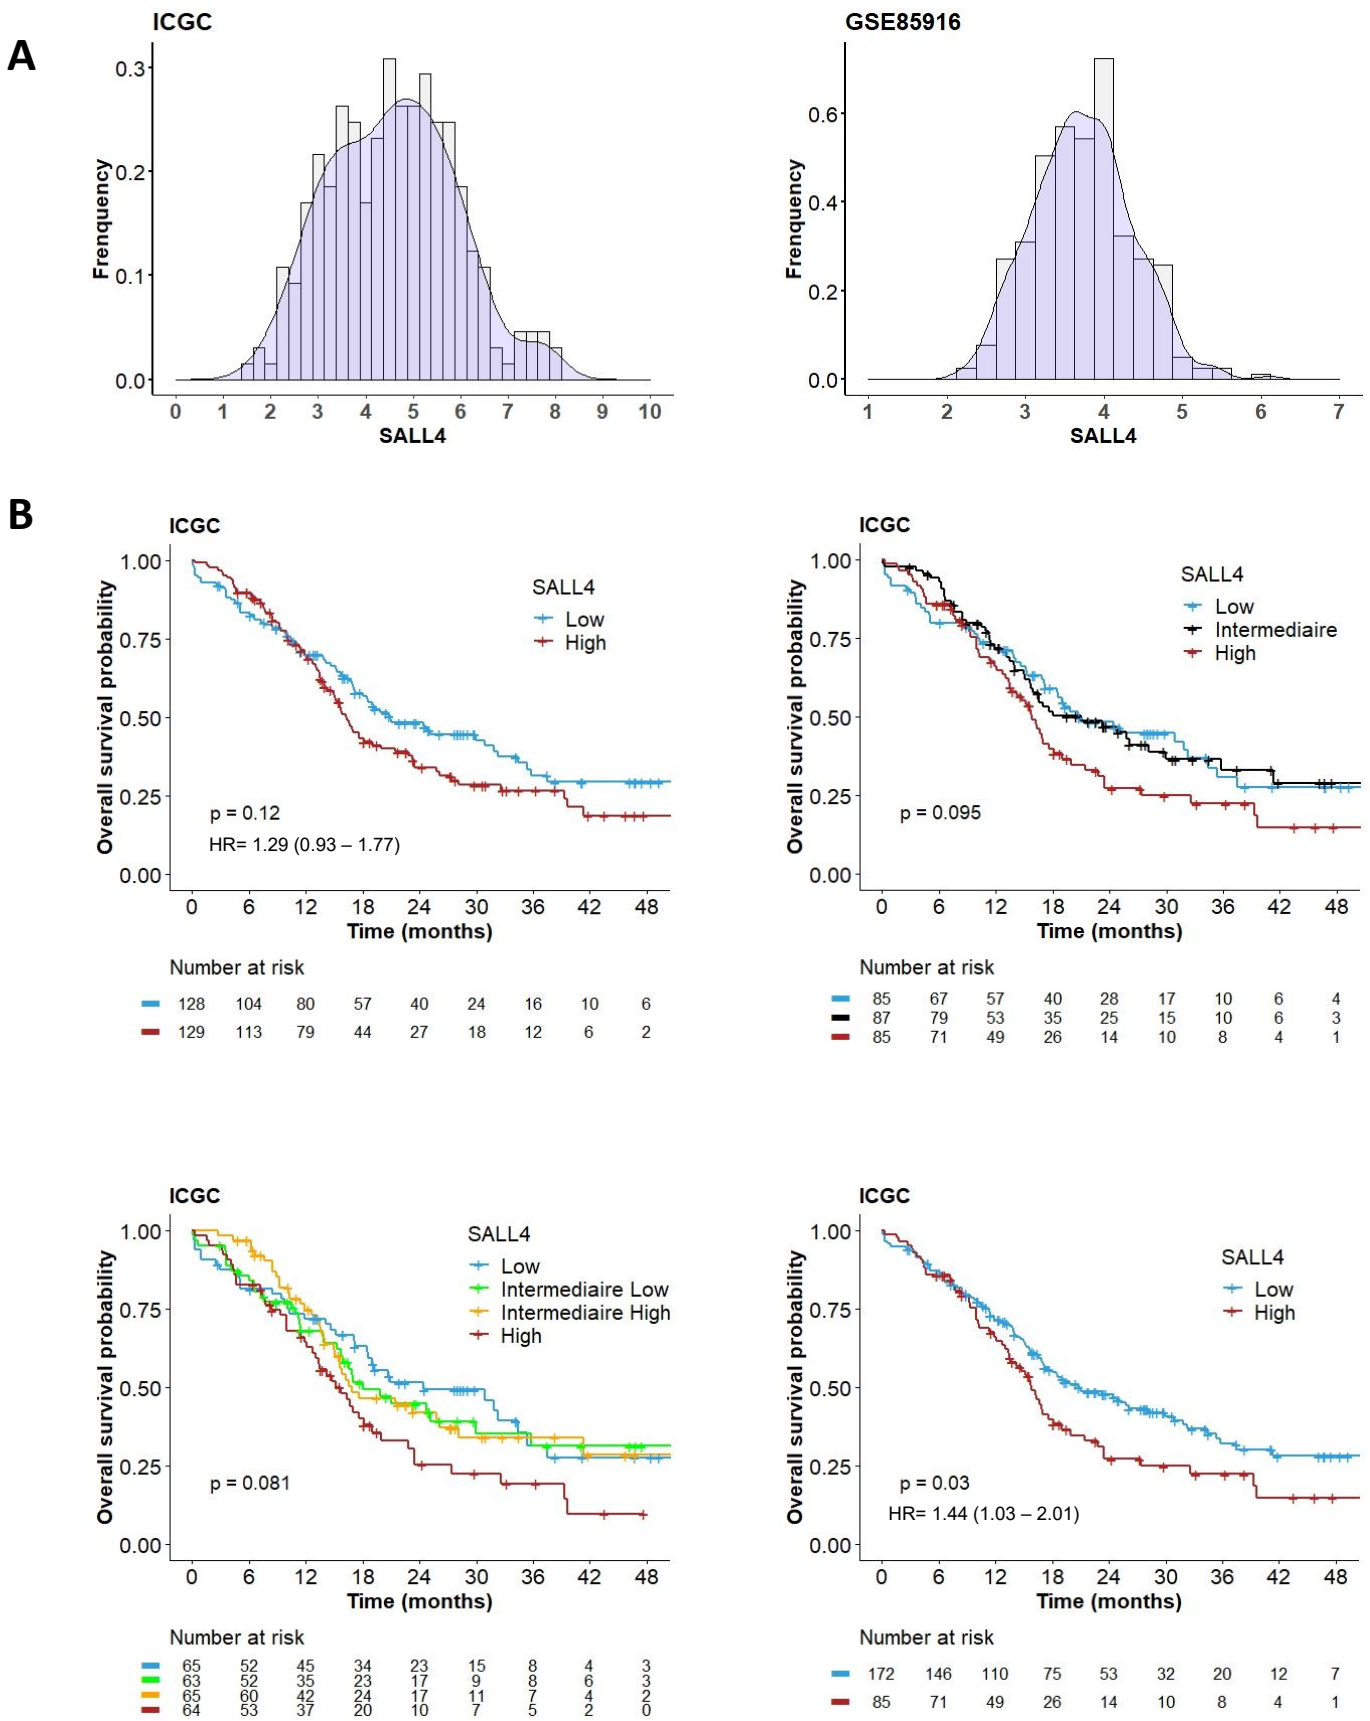

Figure S2

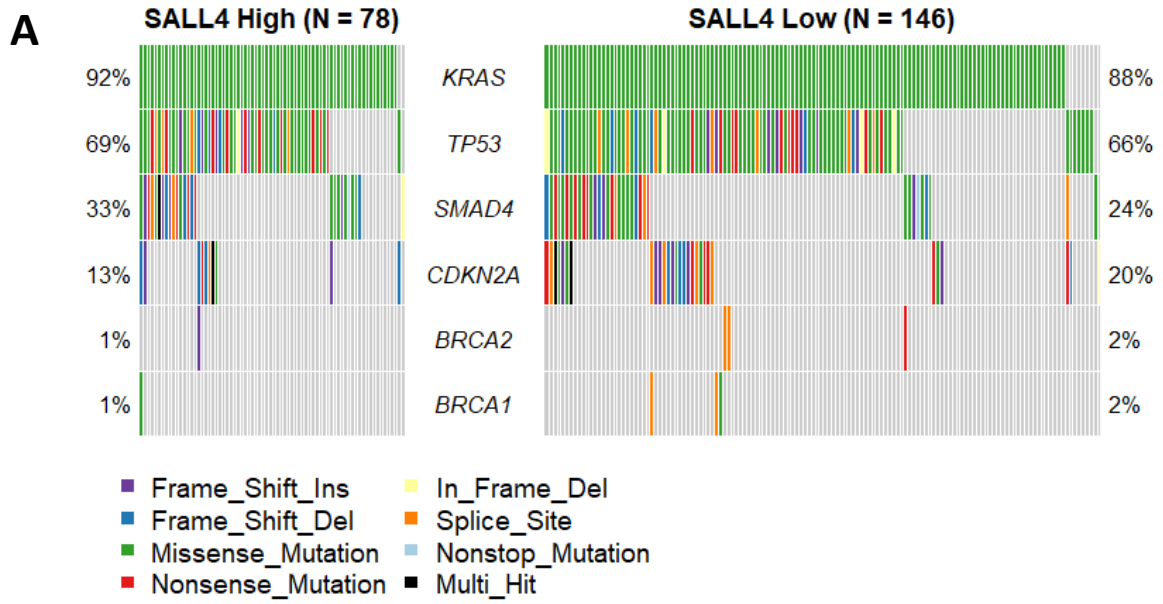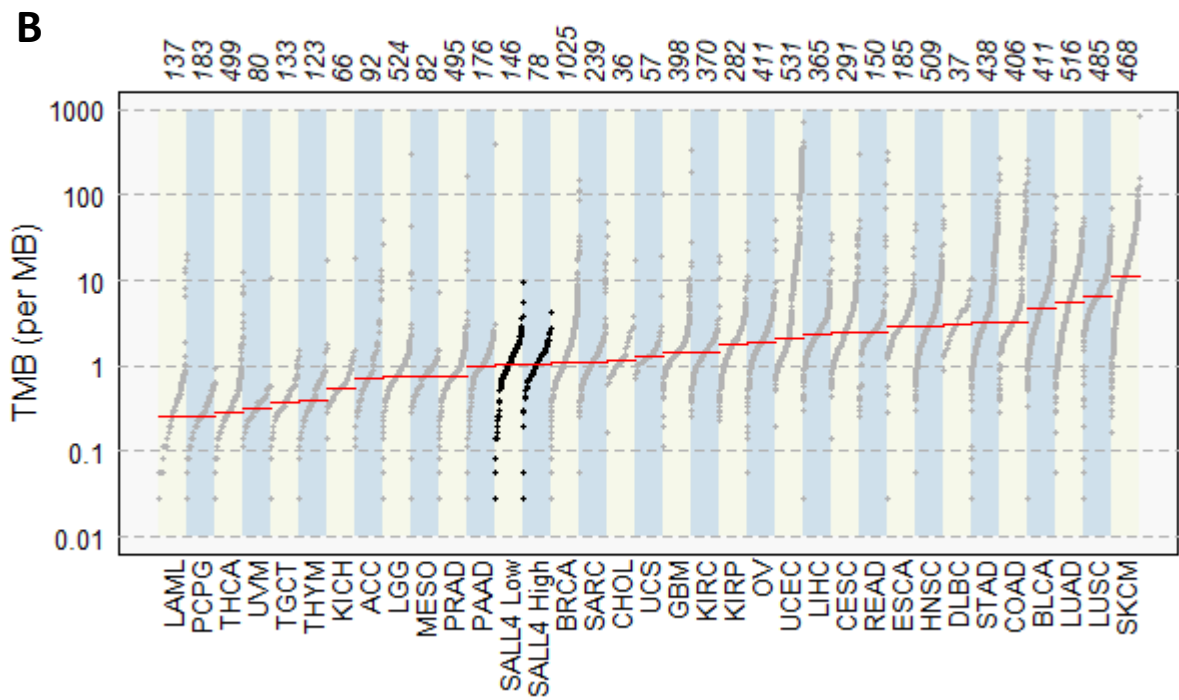

Figure S3

**A**

SALL4 Low  
SALL4 High

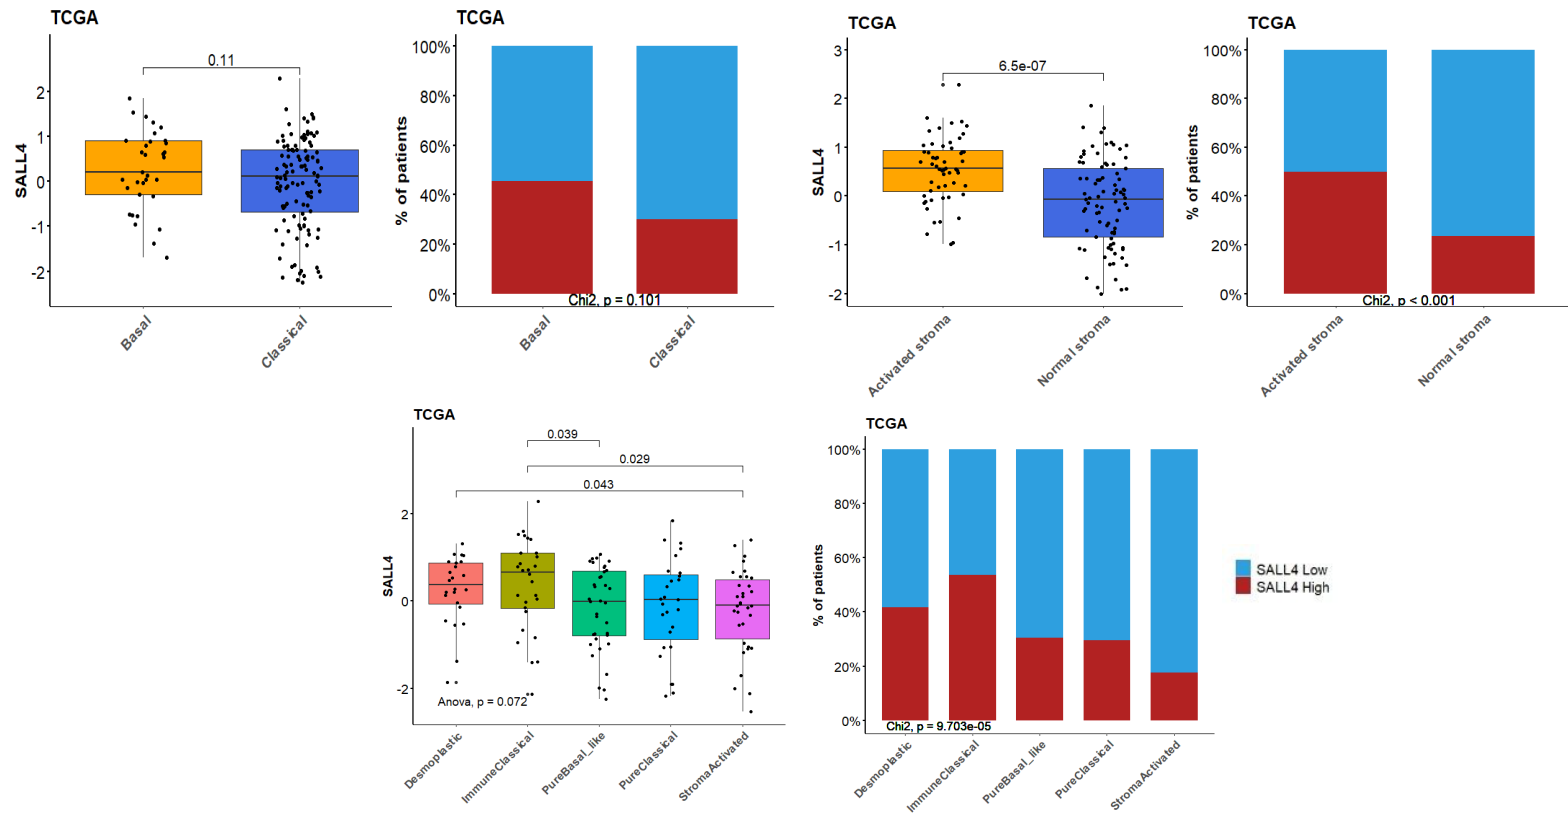

**B**

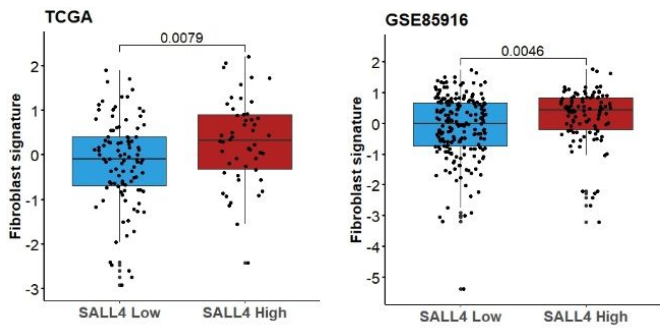

**C**

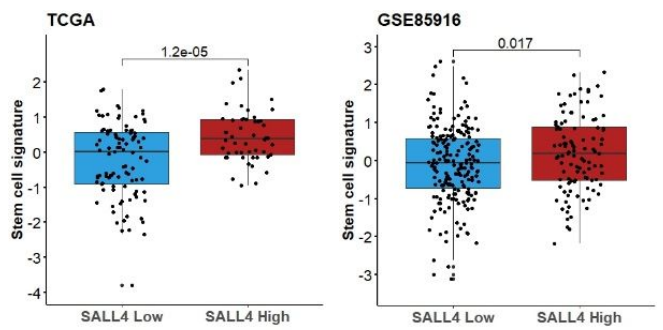

**D**

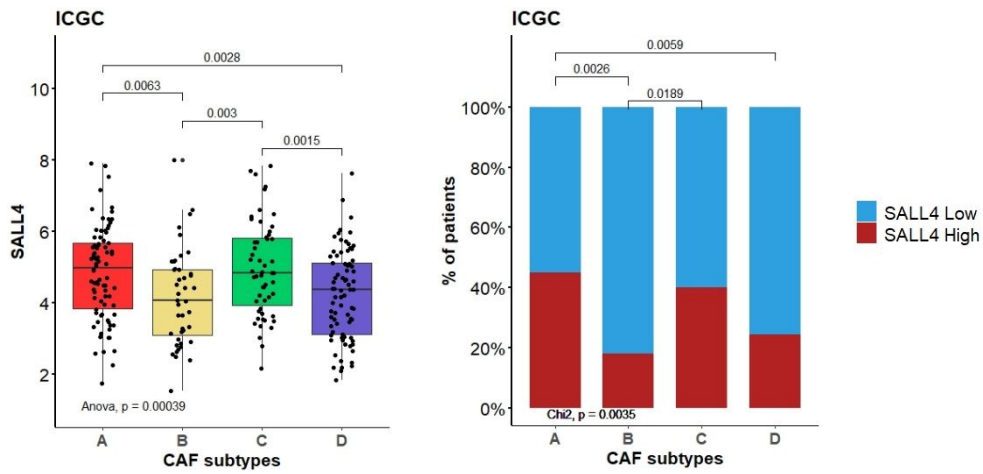

**E**

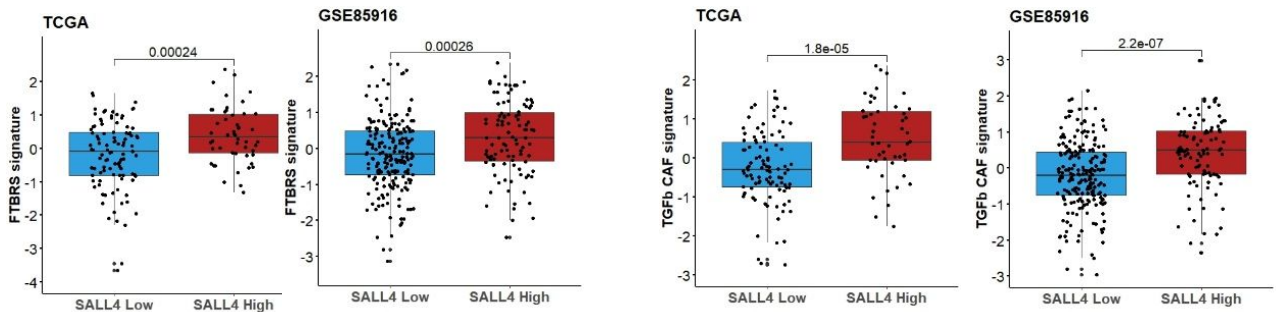

Figure S4

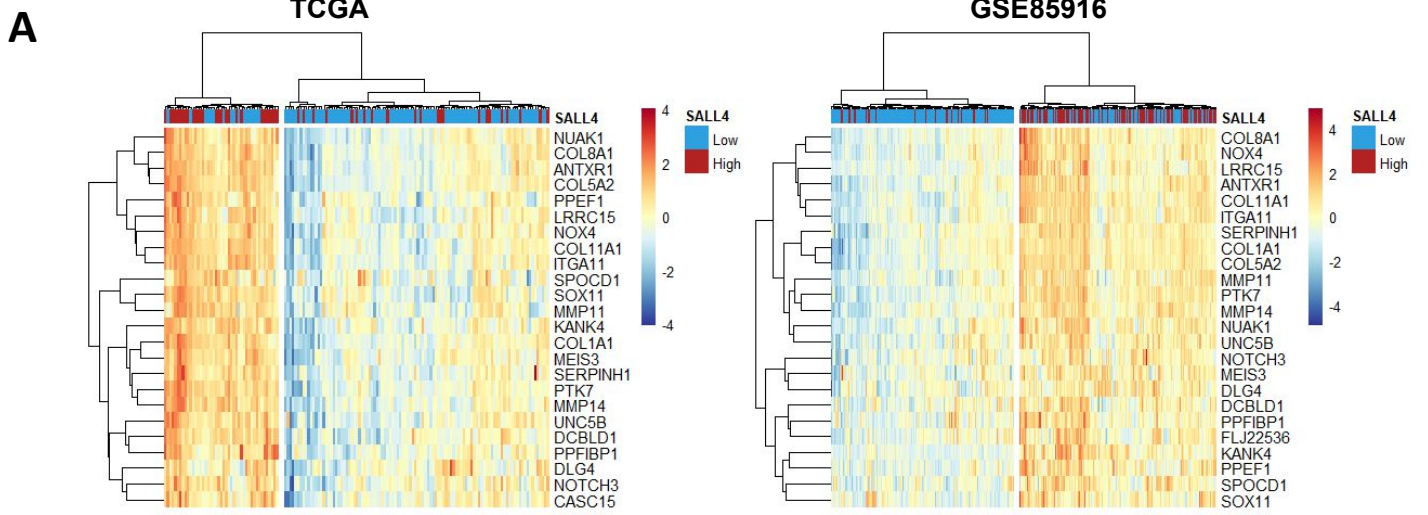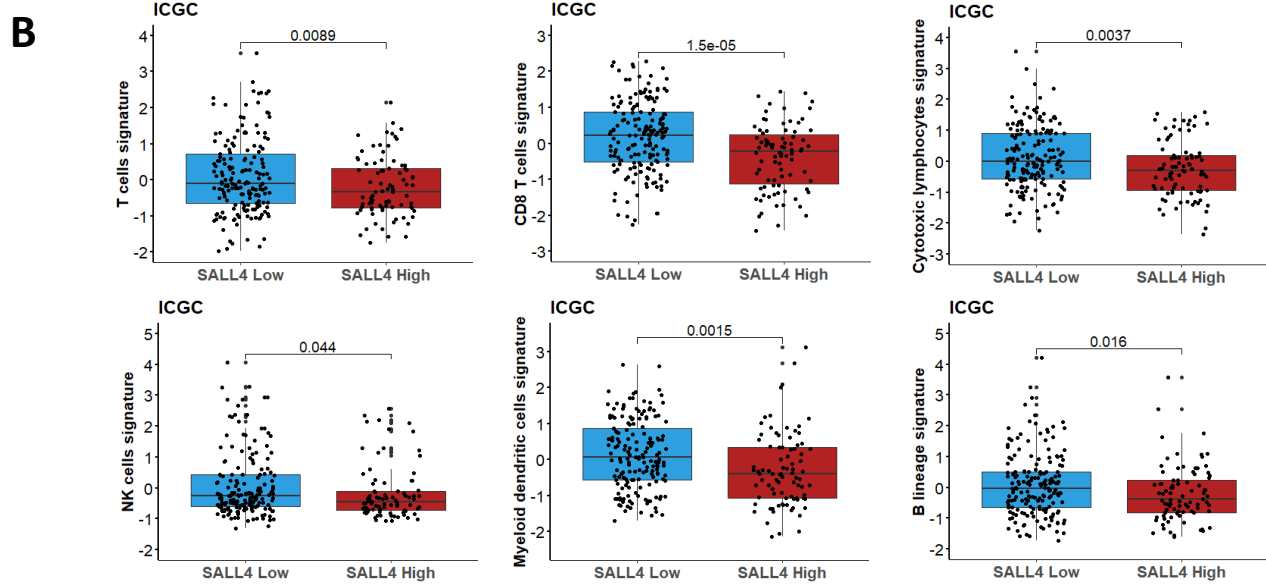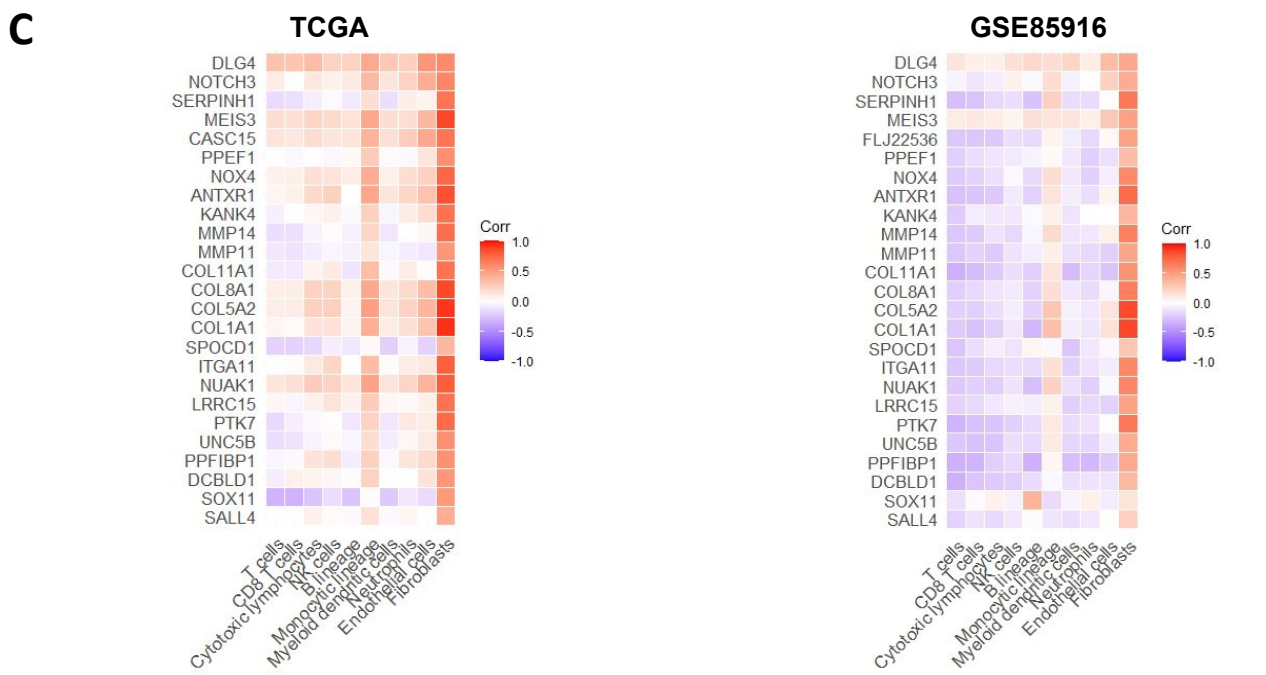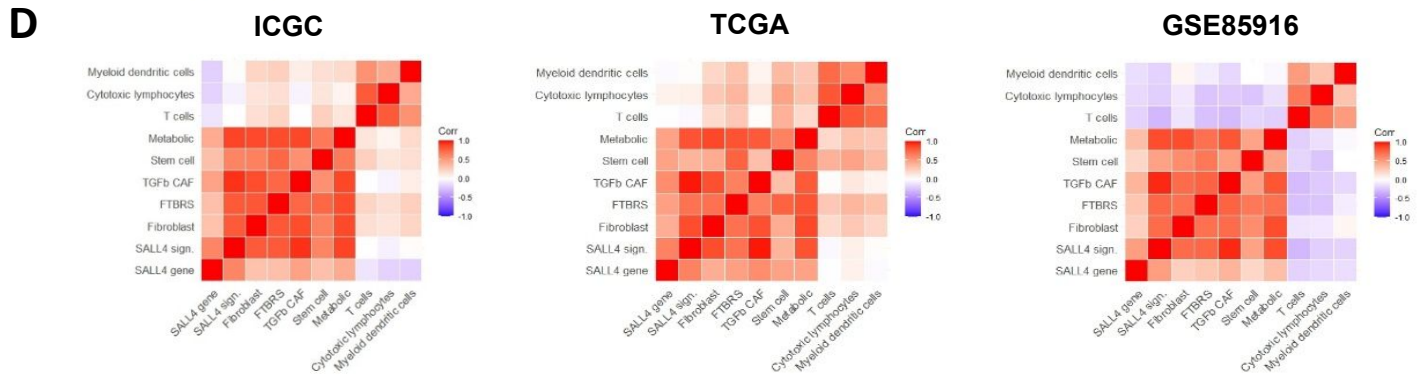

Figure S5

**A**

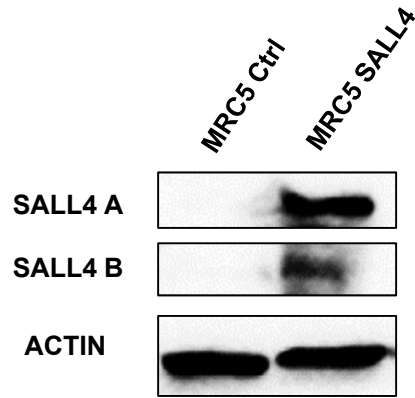

**B**

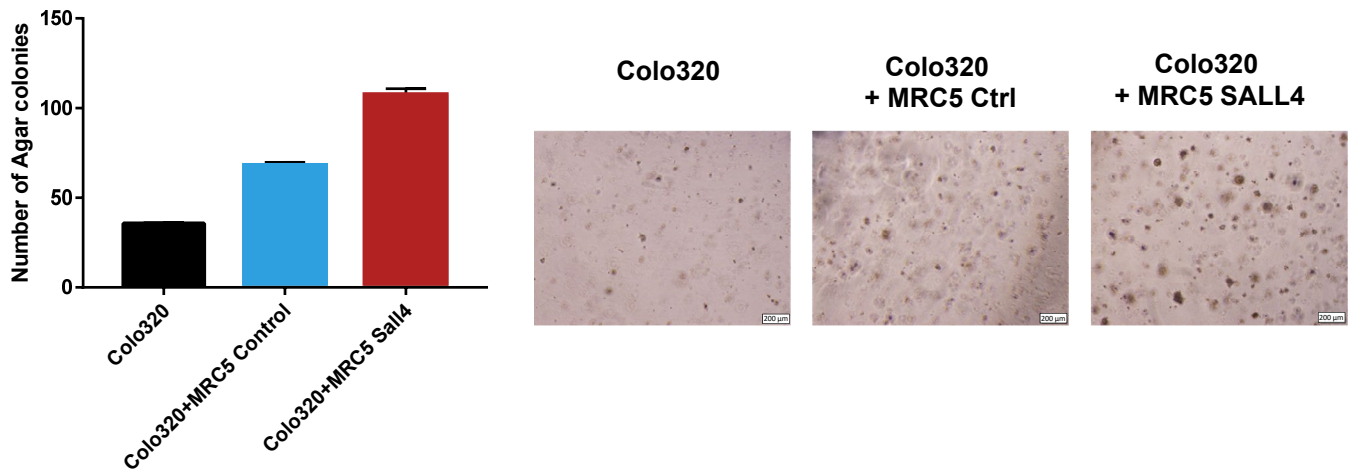

**C**

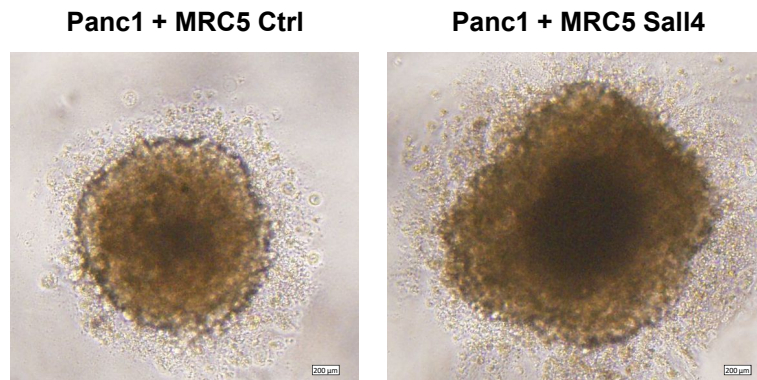

Figure S6

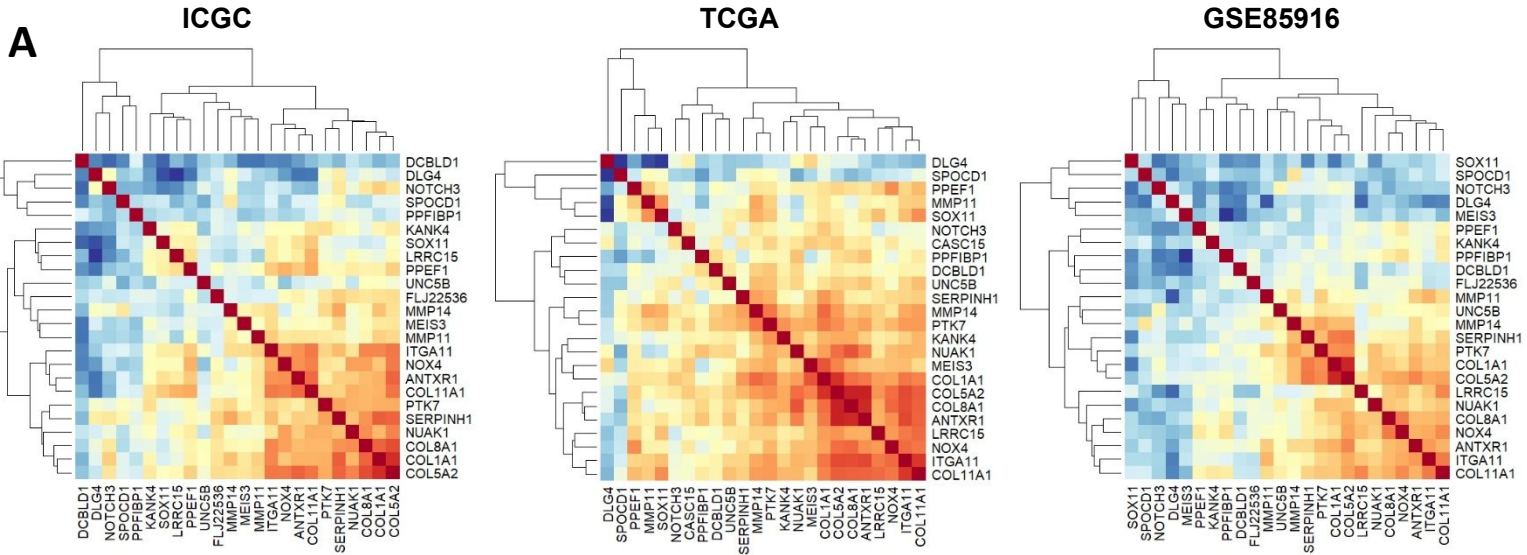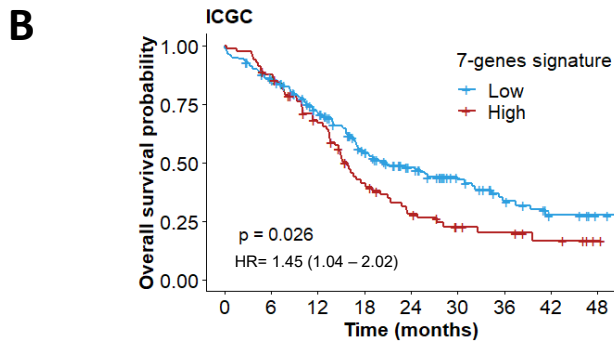

Number at risk

| Time (months) | 0   | 6   | 12  | 18 | 24 | 30 | 36 | 42 | 48 |
|---------------|-----|-----|-----|----|----|----|----|----|----|
| Low           | 175 | 146 | 110 | 74 | 50 | 32 | 20 | 11 | 7  |
| High          | 82  | 71  | 49  | 27 | 17 | 10 | 8  | 5  | 1  |

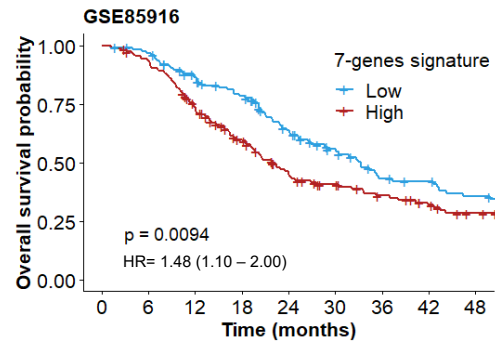

Number at risk

| Time (months) | 0   | 6   | 12  | 18 | 24 | 30 | 36 | 42 | 48 |
|---------------|-----|-----|-----|----|----|----|----|----|----|
| Low           | 129 | 123 | 103 | 90 | 67 | 51 | 37 | 34 | 28 |
| High          | 159 | 147 | 112 | 82 | 57 | 46 | 37 | 29 | 22 |

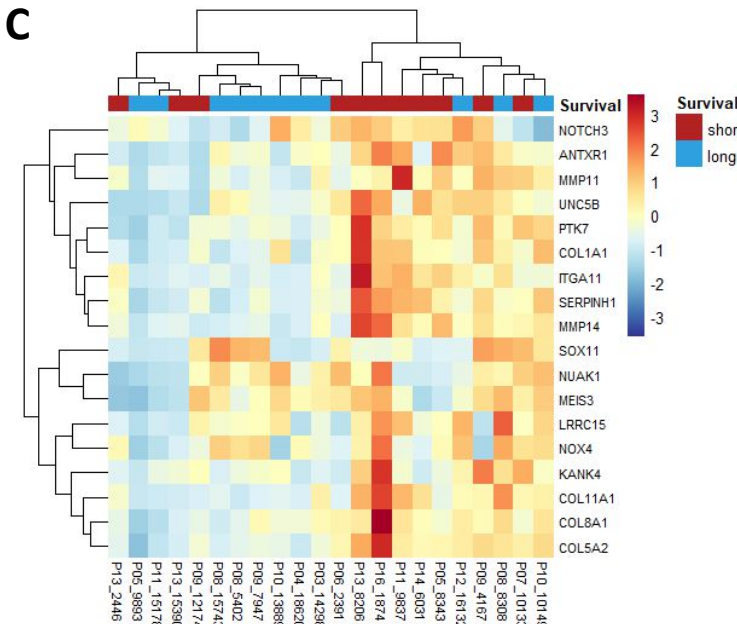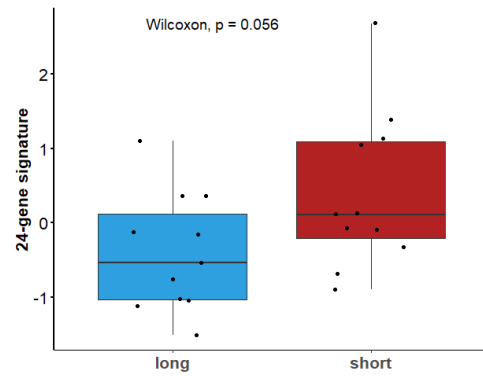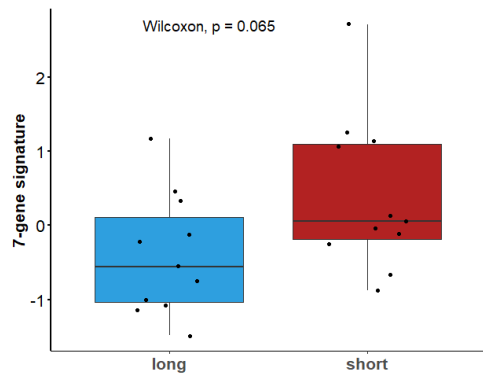

**D** Stromal PTK7 Semi-quantitative scale

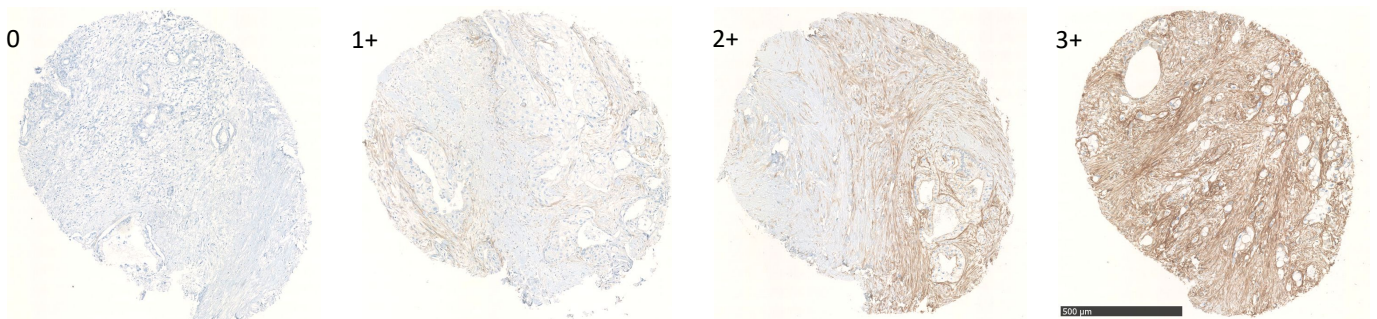



## SUPPLEMENTARY TABLES

**Table S1. Immunohistochemistry antibodies.**

| Antibody | Reference | Species | Clone      | Source         | Dilution |
|----------|-----------|---------|------------|----------------|----------|
| PTK7     | #25618    | Rabbit  | D2Z1N      | Cell Signaling | 1/100    |
| SERPINH1 | sc-5293   | Mouse   | G-12       | Santa Cruz     | 1/500    |
| LRRC15   | Ab150376  | Rabbit  | EPR8188(2) | Abcam          | 1/300    |
| αSMA     | M085129-2 | Mouse   | 1A4        | Agilent        | 1/300    |
| FAP      | Ab207178  | Rabbit  | Ab207178   | Abcam          | 1/250    |
| CD3      | A045201   | Rabbit  | Polyclonal | Agilent        | 1/200    |

**Table S2. Characteristics of the selected publicly datasets.**

| Cohort      | Dataset  | Platform | Technology | Transcriptomic data | Localized PDAC samples | Survival data available | SALL4 probe   | References                                     |
|-------------|----------|----------|------------|---------------------|------------------------|-------------------------|---------------|------------------------------------------------|
| Development | ICGC     | NA       | Illumina   | Microarray          | 259                    | 257                     | ILMN_1695687  | Bailey <i>et al</i> , Nature 2016 [2]          |
| Validation  | TCGA     | NA       | Illumina   | RNA-seq             | 145                    | 145                     | NA            | Cancer Genome Atlas, Cancer Cell 2017 [22]     |
|             | GSE85916 | GPL13667 | Affymetrix | microarray          | 309                    | 288                     | 11728065_a_at | Puleo <i>et al</i> , Gastroenterology 2018 [5] |

Abbreviations: ICGC: International Cancer Genome Consortium; PDAC: pancreatic ductal adenocarcinoma; RNA-seq: RNA-sequencing, TCGA: The Cancer Genome Atlas, NA: not available.

**Table S3. Univariate analyses of different stemness-related genes for overall survival in the ICGC cohort.**

| Parameters         | Univariate analysis |               |                      |          | Multivariate analysis |          |
|--------------------|---------------------|---------------|----------------------|----------|-----------------------|----------|
|                    | No. of patients     | No. of events | Hazard ratio (95%CI) | P-value* | Hazard ratio (95%CI)  | P-value* |
| <b>SOX2</b>        |                     |               |                      |          |                       |          |
| Low                | 147                 | 78            | 1                    |          | 1                     |          |
| High               | 112                 | 76            | 1.45 (1.06 – 2.00)   | 0.02     | 1.50 (1.09 – 2.07)    | 0.01     |
| <b>OCT4/POU5F1</b> |                     |               |                      |          |                       |          |
| Low                | 136                 | 88            | 1                    |          |                       |          |
| High               | 123                 | 66            | 0.78 (0.58 – 1.10)   | 0.17     |                       |          |
| <b>NANOG</b>       |                     |               |                      |          |                       |          |
| Low                | 51                  | 25            | 1                    |          |                       |          |
| High               | 208                 | 129           | 1.34 (0.87 – 2.06)   | 0.18     |                       |          |
| <b>KLF4</b>        |                     |               |                      |          |                       |          |
| Low                | 50                  | 33            | 1                    |          |                       |          |
| High               | 209                 | 121           | 0.69 (0.47 – 1.02)   | 0.06     |                       |          |
| <b>MYC</b>         |                     |               |                      |          |                       |          |
| Low                | 51                  | 32            | 1                    |          |                       |          |
| High               | 208                 | 122           | 0.70 (0.47 – 1.34)   | 0.07     |                       |          |
| <b>SALL4</b>       |                     |               |                      |          |                       |          |
| Low                | 158                 | 88            | 1                    |          | 1                     |          |
| High               | 101                 | 66            | 1.55 (1.12 – 2.15)   | 0.007    | 1.60 (1.16 – 2.22)    | 0.005    |

\*Cox-proportional-hazard models used to estimate the association of the parameters with overall survival. Values of P<0.05 were considered statistically significant and all tests were two-sided.

**Table S4. Patients' characteristics according to *SALL4* expression (using the upper tertile cut-off) for 259 patients with localized pancreatic carcinoma in the ICGC cohort.**

| Characteristics                  | <i>SALL4</i> <sup>low</sup><br>(N = 173) | <i>SALL4</i> <sup>high</sup><br>(N = 86) | P-value |
|----------------------------------|------------------------------------------|------------------------------------------|---------|
| <b>Demographic parameters</b>    |                                          |                                          |         |
| Age, median [IQR], years         | 30.8 [25.0 – 38.0]                       | 29.7 [24.0 – 38.8]                       | 0.42    |
| Sex, No. (%)                     |                                          |                                          | 0.14    |
| Male                             | 90 (52.0)                                | 53 (61.6)                                |         |
| Female                           | 83 (48.0)                                | 33 (38.4)                                |         |
| Ethnicity, No. (%)               |                                          |                                          | 0.54    |
| White                            | 128 (92.1)                               | 69 (89.6)                                |         |
| Asian, black or african american | 11 (7.9)                                 | 8 (10.4)                                 |         |
| Missing                          | 34                                       | 9                                        |         |
| Smoking status, No. (%)          |                                          |                                          | 0.90    |
| Never Smoked                     | 58 (44.3)                                | 30 (42.3)                                |         |
| Stopped Smoking                  | 20 (15.3)                                | 10 (14.1)                                |         |
| Still Smoking                    | 53 (40.4)                                | 31 (43.7)                                |         |
| Missing                          | 42                                       | 15                                       |         |
| <b>Pathologic parameters</b>     |                                          |                                          |         |
| Histology, No. (%)               |                                          |                                          | 0.64    |
| Adenocarcinoma                   | 118 (80.8)                               | 65 (83.3)                                |         |
| Other histology                  | 28 (19.2)                                | 13 (16.7)                                |         |
| Missing                          | 27                                       | 8                                        |         |
| Stage, No. (%)                   |                                          |                                          | 0.04    |
| I                                | 14 (9.6)                                 | 4 (5.1)                                  |         |
| II                               | 132 (90.4)                               | 71 (91.0)                                |         |
| III                              | 0 (0.0)                                  | 3 (3.9)                                  |         |
| Missing                          | 27                                       | 8                                        |         |
| Primary tumor site, No. (%)      |                                          |                                          | 0.51    |
| Head                             | 123 (84.2)                               | 63 (80.8)                                |         |
| Body and/or tail                 | 23 (15.8)                                | 15 (19.2)                                |         |
| Missing                          | 27                                       | 8                                        |         |
| Tumor grade, No. (%)             |                                          |                                          | 0.90    |
| G1                               | 7 (4.9)                                  | 3 (3.9)                                  |         |
| G2                               | 89 (61.8)                                | 47 (61.0)                                |         |
| G3                               | 46 (31.9)                                | 25 (32.5)                                |         |
| G4                               | 2 (1.4)                                  | 2 (2.6)                                  |         |
| Missing                          | 29                                       | 9                                        |         |

\* $\chi^2$  tests or Fisher's exact tests used to compare proportions, and Student's t-tests used to compare continuous variables between *SALL4*<sup>high</sup> and *SALL4*<sup>low</sup>. Values of P<0.05 were considered statistically significant and all tests were two-sided.

**Table S5. Mutational profile according to *SALL4* expression for patients with localized pancreatic carcinoma in the GSE85916 and TCGA cohorts.**

| Characteristics               | GSE85916 cohort                          |                                           |         | TCGA cohort                             |                                          |         |
|-------------------------------|------------------------------------------|-------------------------------------------|---------|-----------------------------------------|------------------------------------------|---------|
|                               | <i>SALL4</i> <sup>low</sup><br>(N = 206) | <i>SALL4</i> <sup>high</sup><br>(N = 103) | P-value | <i>SALL4</i> <sup>low</sup><br>(N = 99) | <i>SALL4</i> <sup>high</sup><br>(N = 50) | P-value |
| <b>KRAS status, No. (%)</b>   |                                          |                                           | 0.73    |                                         |                                          | 0.73    |
| Wild type                     | 23 (12.3)                                | 10 (10.9)                                 |         | 6 (6.1)                                 | 4 (8.0)                                  |         |
| Mutated                       | 164 (87.7)                               | 82 (89.1)                                 |         | 93 (93.9)                               | 46 (92.0)                                |         |
| Missing                       | 19                                       | 11                                        |         | 0                                       | 0                                        |         |
| <b>TP53 status, No. (%)</b>   |                                          |                                           | 0.92    |                                         |                                          |         |
| Wild type                     | 58 (31.0)                                | 28 (30.4)                                 |         | -                                       | -                                        |         |
| Mutated                       | 129 (69.0)                               | 64 (69.6)                                 |         | -                                       | -                                        |         |
| Missing                       | 19                                       | 11                                        |         |                                         |                                          |         |
| <b>CDKN2A status, No. (%)</b> |                                          |                                           | 0.45    |                                         |                                          | 0.12    |
| Wild type                     | 159 (85.0)                               | 75 (81.5)                                 |         | 63 (63.6)                               | 22 (44.0)                                |         |
| Mutated                       | 28 (15.0)                                | 17 (18.5)                                 |         | 15 (15.2)                               | 11 (22.0)                                |         |
| Deleted                       | -                                        | -                                         |         | 18 (18.2)                               | 15 (30.0)                                |         |
| Methylated                    | -                                        | -                                         |         | 3 (3.0)                                 | 2 (4.0)                                  |         |
| Missing                       | 19                                       | 11                                        |         | 0                                       | 0                                        |         |

\* $\chi^2$  tests or Fisher's exact tests used to compare proportions between *SALL4*<sup>high</sup> and *SALL4*<sup>low</sup>. Values of P<0.05 were considered statistically significant and all tests were two-sided.

**Table S6. List of correlated genes with SALL4 expression in the ICGC, GSE85916, and TCGA cohorts**

| ICGC         |                         |          |                |                                                                  |
|--------------|-------------------------|----------|----------------|------------------------------------------------------------------|
| Gene symbol  | Correlation coefficient | p-value  | p-value adjust | Gene description                                                 |
| PTK7         | 0,564162349             | 3,63E-23 | 5,68E-19       | Protein Tyrosine Kinase 7                                        |
| GPX8         | 0,538922072             | 6,51E-21 | 5,86E-17       | Glutathione Peroxidase 8                                         |
| NUAK1        | 0,538203225             | 7,50E-21 | 5,86E-17       | NUAK Family Kinase 1                                             |
| PPFIBP1      | 0,520377904             | 2,25E-19 | 1,01E-15       | PPFIA Binding Protein 1                                          |
| DRD4         | 0,515496759             | 5,52E-19 | 2,16E-15       | Dopamine Receptor D4                                             |
| MGC24103     | 0,508884625             | 1,82E-18 | 5,88E-15       | MGC24103                                                         |
| COL8A1       | 0,507631921             | 2,27E-18 | 6,46E-15       | Collagen Type VIII Alpha 1 Chain                                 |
| LOC100131139 | 0,504298201             | 4,10E-18 | 1,07E-14       | Similar to double homeobox A                                     |
| CHPF         | 0,503688575             | 4,56E-18 | 1,10E-14       | Chondroitin Polymerizing Factor                                  |
| LRRFIP1      | 0,50185281              | 6,28E-18 | 1,31E-14       | LRR Binding FLII Interacting Protein 1                           |
| DCBLD1       | 0,498733799             | 1,08E-17 | 2,11E-14       | Discoidin, CUB And LCCL Domain Containing 1                      |
| EDNRA        | 0,497770864             | 1,27E-17 | 2,35E-14       | Endothelin Receptor Type A                                       |
| FKBP14       | 0,495374592             | 1,92E-17 | 3,16E-14       | FKBP Prolyl Isomerase 14                                         |
| TAOK1        | 0,492210165             | 3,29E-17 | 4,68E-14       | TAO Kinase 1                                                     |
| AEBP1        | 0,489673837             | 5,04E-17 | 6,30E-14       | AE Binding Protein 1                                             |
| MXRA5        | 0,482696883             | 1,60E-16 | 1,85E-13       | Matrix Remodeling Associated 5                                   |
| COL11A1      | 0,478846375             | 2,99E-16 | 3,34E-13       | Collagen Type XI Alpha 1 Chain                                   |
| SOX4         | 0,477320791             | 3,83E-16 | 3,99E-13       | SRY-Box Transcription Factor 4                                   |
| MMP14        | 0,476077479             | 4,67E-16 | 4,72E-13       | Matrix Metalloproteinase 14                                      |
| ZNF827       | 0,475128651             | 5,44E-16 | 5,32E-13       | Zinc Finger Protein 827                                          |
| LOC100134424 | 0,474263177             | 6,25E-16 | 5,92E-13       | Similar to Immediate early response 5-like                       |
| KIRREL       | 0,473189859             | 7,41E-16 | 6,62E-13       | Kirre Like Nephrin Family Adhesion Molecule 1                    |
| COL5A2       | 0,473069999             | 7,55E-16 | 6,62E-13       | Collagen Type V Alpha 2 Chain                                    |
| UNC5B        | 0,473016858             | 7,61E-16 | 6,62E-13       | Unc-5 Netrin Receptor B                                          |
| LOC100134134 | 0,471107551             | 1,03E-15 | 8,71E-13       | Similar to peroxidasin homolog                                   |
| VGLL4        | 0,466628067             | 2,08E-15 | 1,62E-12       | Vestigial Like Family Member 4                                   |
| LRRC15       | 0,465431431             | 2,50E-15 | 1,86E-12       | Leucine Rich Repeat Containing 15                                |
| KLHL28       | 0,462406949             | 3,98E-15 | 2,90E-12       | Kelch Like Family Member 28                                      |
| IER5L        | 0,462087618             | 4,18E-15 | 2,97E-12       | Immediate Early Response 5 Like                                  |
| ITGA11       | 0,460015643             | 5,74E-15 | 3,99E-12       | Integrin Subunit Alpha 11                                        |
| N4BP2        | 0,456728232             | 9,43E-15 | 6,42E-12       | NEDD4 Binding Protein 2                                          |
| COL1A1       | 0,456041502             | 1,05E-14 | 6,75E-12       | Collagen Type I Alpha 1 Chain                                    |
| DCHS1        | 0,455967687             | 1,06E-14 | 6,75E-12       | Dachsous Cadherin-Related 1                                      |
| ZNF532       | 0,454214543             | 1,37E-14 | 8,12E-12       | Zinc Finger Protein 532                                          |
| LOC284297    | 0,453254601             | 1,59E-14 | 8,86E-12       | Scavenger receptor cysteine rich family member with 5 domains    |
| NOTCH3       | 0,451840517             | 1,96E-14 | 1,03E-11       | Notch Receptor 3                                                 |
| FAM63B       | 0,451806765             | 1,97E-14 | 1,03E-11       | MINDY Lysine 48 Deubiquitinase 2                                 |
| CAMSAP1L1    | 0,451258382             | 2,13E-14 | 1,09E-11       | Calmodulin Regulated Spectrin Associated Protein Family Member 2 |
| LOC399900    | 0,451041582             | 2,20E-14 | 1,11E-11       | Uncharacterized LOC399900                                        |
| OSBPL5       | 0,449671522             | 2,69E-14 | 1,34E-11       | Oxysterol Binding Protein Like 5                                 |
| LPAR4        | 0,449206801             | 2,88E-14 | 1,39E-11       | Lysophosphatidic Acid Receptor 4                                 |
| CHD8         | 0,447860473             | 3,51E-14 | 1,64E-11       | Chromodomain Helicase DNA Binding Protein 8                      |
| DENR         | 0,445929771             | 4,65E-14 | 2,11E-11       | Density Regulated Re-Initiation And Release Factor               |

|              |             |          |          |                                                               |
|--------------|-------------|----------|----------|---------------------------------------------------------------|
| ZNF669       | 0,445212838 | 5,16E-14 | 2,31E-11 | Zinc Finger Protein 669                                       |
| THBS2        | 0,44492738  | 5,38E-14 | 2,37E-11 | Thrombospondin 2                                              |
| KIAA1217     | 0,444243317 | 5,94E-14 | 2,55E-11 | KIAA1217                                                      |
| FLJ22536     | 0,443253953 | 6,85E-14 | 2,84E-11 | Cancer Susceptibility 15                                      |
| TMEM158      | 0,442537054 | 7,60E-14 | 3,05E-11 | Transmembrane Protein 158                                     |
| LOC100131541 | 0,440644984 | 9,96E-14 | 3,75E-11 | uncharacterized LOC100131541                                  |
| ZNF773       | 0,440400938 | 1,03E-13 | 3,84E-11 | Zinc Finger Protein 773                                       |
| C14ORF82     | 0,440321596 | 1,04E-13 | 3,84E-11 | FRMD6 Antisense RNA 1                                         |
| CROCC        | 0,43972745  | 1,13E-13 | 4,04E-11 | Ciliary Rootlet Coiled-Coil, Rootletin                        |
| RNY3         | 0,439538463 | 1,17E-13 | 4,07E-11 | RNA, Ro60-Associated Y3                                       |
| LEPREL2      | 0,437204509 | 1,62E-13 | 5,40E-11 | Prolyl 3-Hydroxylase 3                                        |
| NUCKS1       | 0,435986258 | 1,93E-13 | 6,28E-11 | Nuclear Casein Kinase And Cyclin Dependent Kinase Substrate 1 |
| FCAR         | 0,43557624  | 2,04E-13 | 6,58E-11 | Fc Fragment Of IgA Receptor                                   |
| LOC100129539 | 0,435511388 | 2,06E-13 | 6,58E-11 | Hypothetical LOC100129539                                     |
| LOC440345    | 0,435111938 | 2,18E-13 | 6,88E-11 | Nuclear pore complex interacting protein family member B4     |
| EIF2C2       | 0,434668959 | 2,32E-13 | 7,11E-11 | Argonaute RISC Catalytic Component 2                          |
| HTRA1        | 0,434085955 | 2,51E-13 | 7,56E-11 | HtrA Serine Peptidase 1                                       |
| C1ORF152     | 0,434002484 | 2,54E-13 | 7,58E-11 | Profilin 1 Pseudogene 2                                       |
| WDFY1        | 0,433701906 | 2,65E-13 | 7,83E-11 | WD Repeat And FYVE Domain Containing 1                        |
| NOX4         | 0,433228079 | 2,83E-13 | 8,29E-11 | NADPH Oxidase 4                                               |
| MAR6         | 0,432568851 | 3,11E-13 | 9,00E-11 | Retrotransposon Gag Like 6                                    |
| LEPRE1       | 0,430966989 | 3,88E-13 | 1,08E-10 | Prolyl 3-Hydroxylase 1                                        |
| ZSWIM4       | 0,43052181  | 4,12E-13 | 1,12E-10 | Zinc Finger SWIM-Type Containing 4                            |
| MAGT1        | 0,430003658 | 4,43E-13 | 1,18E-10 | Magnesium Transporter 1                                       |
| COL5A1       | 0,429691184 | 4,62E-13 | 1,22E-10 | Collagen Type V Alpha 1 Chain                                 |
| ANGPT2       | 0,429678196 | 4,63E-13 | 1,22E-10 | Angiopoietin 2                                                |
| COL7A1       | 0,42914062  | 4,99E-13 | 1,30E-10 | Collagen Type VII Alpha 1 Chain                               |
| SPOCD1       | 0,427899242 | 5,91E-13 | 1,52E-10 | SPOC Domain Containing 1                                      |
| RUNDC2C      | 0,427071232 | 6,62E-13 | 1,67E-10 | Sorting Nexin 29 Pseudogene 2                                 |
| MFSD11       | 0,425338851 | 8,38E-13 | 2,08E-10 | Major Facilitator Superfamily Domain Containing 11            |
| LOC100133950 | 0,424994866 | 8,78E-13 | 2,16E-10 | Hypothetical protein LOC100133950                             |
| PPEF1        | 0,424342501 | 9,60E-13 | 2,33E-10 | Protein Phosphatase With EF-Hand Domain 1                     |
| TDRD1        | 0,423930625 | 1,01E-12 | 2,42E-10 | Tudor Domain Containing 1                                     |
| MMP11        | 0,423868776 | 1,02E-12 | 2,43E-10 | Matrix Metallopeptidase 11                                    |
| LOC728653    | 0,423675095 | 1,05E-12 | 2,47E-10 | Uncharacterized LOC728653                                     |
| ANTXR1       | 0,422622234 | 1,21E-12 | 2,83E-10 | ANTXR Cell Adhesion Molecule 1                                |
| SHROOM4      | 0,421913228 | 1,33E-12 | 3,07E-10 | Shroom Family Member 4                                        |
| SERPINH1     | 0,421241623 | 1,46E-12 | 3,33E-10 | Serpin Family H Member 1                                      |
| FLJ39632     | 0,420878977 | 1,53E-12 | 3,44E-10 | Double Homeobox A Pseudogene 9                                |
| LRAP         | 0,420828369 | 1,54E-12 | 3,44E-10 | Endoplasmic Reticulum Aminopeptidase 2                        |
| SLC38A7      | 0,420217815 | 1,67E-12 | 3,68E-10 | Solute Carrier Family 38 Member 7                             |
| ZNF600       | 0,419867551 | 1,75E-12 | 3,83E-10 | Zinc Finger Protein 600                                       |
| COL6A3       | 0,419558094 | 1,82E-12 | 3,96E-10 | Collagen Type VI Alpha 3 Chain                                |
| PIGX         | 0,419377263 | 1,87E-12 | 4,00E-10 | Phosphatidylinositol Glycan Anchor Biosynthesis Class X       |
| LOC648059    | 0,419120038 | 1,93E-12 | 4,09E-10 | Hypothetical protein LOC648059                                |
| HIATL2       | 0,418131656 | 2,20E-12 | 4,51E-10 | Major Facilitator Superfamily Domain Containing 14C           |

|              |              |          |          |                                                                          |
|--------------|--------------|----------|----------|--------------------------------------------------------------------------|
| GLI3         | 0,417742293  | 2,32E-12 | 4,69E-10 | GLI Family Zinc Finger 3                                                 |
| ZNF577       | 0,417487104  | 2,40E-12 | 4,81E-10 | Zinc Finger Protein 577                                                  |
| BRD3         | 0,417063553  | 2,54E-12 | 5,06E-10 | Bromodomain Containing 3                                                 |
| LPP          | 0,416660452  | 2,68E-12 | 5,27E-10 | LIM Domain Containing Preferred Translocation Partner In Lipoma          |
| SOX11        | 0,416174593  | 2,85E-12 | 5,58E-10 | SRY-Box Transcription Factor 11                                          |
| HNRNPU       | 0,4159681    | 2,93E-12 | 5,70E-10 | Heterogeneous Nuclear Ribonucleoprotein U                                |
| LOC647389    | 0,415446212  | 3,14E-12 | 6,03E-10 | Hypothetical protein LOC647389                                           |
| LOC730313    | 0,415332368  | 3,19E-12 | 6,08E-10 | Similar to postmeiotic segregation increased 2-like 2                    |
| LOC728779    | 0,415100641  | 3,29E-12 | 6,23E-10 | Hypothetical LOC728779                                                   |
| MBTD1        | 0,414666146  | 3,48E-12 | 6,44E-10 | Mbt Domain Containing 1                                                  |
| CTSB         | 0,414162084  | 3,72E-12 | 6,84E-10 | Cathepsin B                                                              |
| KIAA1602     | 0,413298244  | 4,16E-12 | 7,48E-10 | NCK Associated Protein 5 Like                                            |
| LOC100132391 | 0,41312839   | 4,25E-12 | 7,55E-10 | Hypothetical protein LOC100132391                                        |
| ZNF148       | 0,413103283  | 4,27E-12 | 7,55E-10 | Zinc Finger Protein 148                                                  |
| LOC400406    | 0,412307773  | 4,73E-12 | 8,32E-10 | ADAMTS7 pseudogene 3                                                     |
| ANKRD38      | 0,411623393  | 5,17E-12 | 9,00E-10 | KN Motif And Ankyrin Repeat Domains 4                                    |
| LOC100130835 | 0,411615551  | 5,18E-12 | 9,00E-10 | Hypothetical LOC100130835                                                |
| ALPK2        | 0,411441305  | 5,30E-12 | 9,16E-10 | Alpha Kinase 2                                                           |
| IGFBP3       | 0,410691168  | 5,84E-12 | 9,98E-10 | Insulin Like Growth Factor Binding Protein 3                             |
| NPR3         | 0,408879614  | 7,37E-12 | 1,23E-09 | Natriuretic Peptide Receptor 3                                           |
| LOC100133144 | 0,408597926  | 7,64E-12 | 1,27E-09 | Ubiquitin-conjugating enzyme E2Q family member 2 pseudogene 3            |
| LOC100133516 | 0,407655461  | 8,63E-12 | 1,41E-09 | Hypothetical protein LOC100133516                                        |
| GPR1         | 0,406653332  | 9,80E-12 | 1,59E-09 | G Protein-Coupled Receptor 1                                             |
| COL6A1       | 0,406274212  | 1,03E-11 | 1,66E-09 | Collagen Type VI Alpha 1 Chain                                           |
| ARL16        | 0,40590477   | 1,08E-11 | 1,71E-09 | ADP Ribosylation Factor Like GTPase 16                                   |
| GDI1         | 0,403814621  | 1,41E-11 | 2,20E-09 | GDP Dissociation Inhibitor 1                                             |
| QRFR         | 0,402746965  | 1,61E-11 | 2,48E-09 | Pyroglutamylated RFamide Peptide Receptor                                |
| MEIS3        | 0,402522538  | 1,65E-11 | 2,54E-09 | Meis Homeobox 3                                                          |
| SGIP1        | 0,402359766  | 1,69E-11 | 2,58E-09 | SH3GL Interacting Endocytic Adaptor 1                                    |
| XRCC2        | 0,402120899  | 1,74E-11 | 2,62E-09 | X-Ray Repair Cross Complementing 2                                       |
| ATXN3        | 0,40210111   | 1,74E-11 | 2,62E-09 | Ataxin 3                                                                 |
| DLG4         | 0,401860246  | 1,80E-11 | 2,68E-09 | Discs Large MAGUK Scaffold Protein 4                                     |
| TWIST1       | 0,401518382  | 1,88E-11 | 2,77E-09 | Twist Family BHLH Transcription Factor 1                                 |
| FZD2         | 0,401094332  | 1,98E-11 | 2,89E-09 | Frizzled Class Receptor 2                                                |
| KANK4        | 0,400522136  | 2,13E-11 | 3,07E-09 | KN Motif And Ankyrin Repeat Domains 4                                    |
| LOC440055    | -0,400903124 | 2,03E-11 | 2,94E-09 | Ribosomal protein S12 pseudogene 22                                      |
| APIP         | -0,400993198 | 2,00E-11 | 2,92E-09 | APAF1 Interacting Protein                                                |
| SDHA         | -0,401201577 | 1,95E-11 | 2,87E-09 | Succinate Dehydrogenase Complex Flavoprotein Subunit A                   |
| LOC100130707 | -0,401645329 | 1,85E-11 | 2,74E-09 | Hypothetical protein LOC100130707                                        |
| TBL2         | -0,40203217  | 1,76E-11 | 2,64E-09 | Transducin Beta Like 2                                                   |
| LOC647081    | -0,402151716 | 1,73E-11 | 2,62E-09 | Succinate dehydrogenase complex subunit D pseudogene 2                   |
| MRPS18C      | -0,40356406  | 1,45E-11 | 2,25E-09 | Mitochondrial Ribosomal Protein S18C                                     |
| NHP2         | -0,403611487 | 1,44E-11 | 2,25E-09 | NHP2 Ribonucleoprotein                                                   |
| LOC652864    | -0,404983481 | 1,21E-11 | 1,91E-09 | Similar to Mitochondrial import inner membrane translocase subunit Tim23 |
| MRPS27       | -0,405701168 | 1,11E-11 | 1,75E-09 | Mitochondrial Ribosomal Protein S27                                      |
| SFRS2B       | -0,406020373 | 1,06E-11 | 1,70E-09 | Serine And Arginine Rich Splicing Factor 8                               |

|              |              |          |          |                                                                      |
|--------------|--------------|----------|----------|----------------------------------------------------------------------|
| MKI67IP      | -0,406039073 | 1,06E-11 | 1,70E-09 | Nucleolar Protein Interacting With The FHA Domain Of MKI67           |
| C4ORF14      | -0,407202565 | 9,14E-12 | 1,49E-09 | Nitric Oxide Associated 1                                            |
| CBWD5        | -0,408011154 | 8,24E-12 | 1,36E-09 | COBW Domain Containing 5                                             |
| MRPL45       | -0,409114589 | 7,15E-12 | 1,20E-09 | Mitochondrial Ribosomal Protein L45                                  |
| RPL36AL      | -0,409583886 | 6,73E-12 | 1,13E-09 | Ribosomal Protein L36a Like                                          |
| LOC644762    | -0,410144374 | 6,26E-12 | 1,06E-09 | MFF pseudogene 2                                                     |
| IMPA2        | -0,410509042 | 5,98E-12 | 1,02E-09 | Inositol Monophosphatase 2                                           |
| UBB          | -0,411048122 | 5,57E-12 | 9,58E-10 | Ubiquitin B                                                          |
| ATP5O        | -0,413209248 | 4,21E-12 | 7,53E-10 | ATP Synthase Peripheral Stalk Subunit OSCP                           |
| LOC100133372 | -0,41349929  | 4,05E-12 | 7,33E-10 | Similar to heterogeneous nuclear ribonucleoprotein A1                |
| RPS5         | -0,413587634 | 4,01E-12 | 7,29E-10 | Ribosomal Protein S5                                                 |
| AHCY         | -0,414099552 | 3,75E-12 | 6,86E-10 | Adenosylhomocysteinase                                               |
| RPS15A       | -0,414710533 | 3,46E-12 | 6,44E-10 | Ribosomal Protein S15a                                               |
| RPL26        | -0,414798721 | 3,42E-12 | 6,41E-10 | Ribosomal Protein L26                                                |
| ATP5J        | -0,414929187 | 3,36E-12 | 6,34E-10 | ATP Synthase Peripheral Stalk Subunit F6                             |
| ALG14        | -0,415505111 | 3,12E-12 | 6,02E-10 | ALG14 UDP-N-Acetylglucosaminyltransferase Subunit                    |
| C3ORF23      | -0,416749337 | 2,65E-12 | 5,24E-10 | T Cell Activation Inhibitor, Mitochondrial                           |
| HSPA8        | -0,418084047 | 2,22E-12 | 4,51E-10 | Heat Shock Protein Family A (Hsp70) Member 8                         |
| COX7C        | -0,418657652 | 2,06E-12 | 4,23E-10 | Cytochrome C Oxidase Subunit 7C                                      |
| LOC728666    | -0,41869406  | 2,05E-12 | 4,23E-10 | PRELI domain containing 1 pseudogene 1                               |
| LOC728188    | -0,418832318 | 2,01E-12 | 4,19E-10 | Similar to phosphoglycerate mutase processed protein                 |
| LOC653566    | -0,418963889 | 1,97E-12 | 4,14E-10 | Signal peptidase complex subunit 2 pseudogene 4                      |
| IMMP2L       | -0,419325259 | 1,88E-12 | 4,00E-10 | Inner Mitochondrial Membrane Peptidase Subunit 2                     |
| NDUFB2       | -0,419415928 | 1,86E-12 | 4,00E-10 | NADH:Ubiquinone Oxidoreductase Subunit B2                            |
| LOC100129086 | -0,420614697 | 1,58E-12 | 3,52E-10 | HIG1 hypoxia inducible domain family member 1A pseudogene 1          |
| LOC389386    | -0,420985024 | 1,51E-12 | 3,42E-10 | Leucine aminopeptidase 3 pseudogene 2                                |
| LOC644761    | -0,421904687 | 1,33E-12 | 3,07E-10 | Phosphatidylinositol glycan anchor biosynthesis class H pseudogene 1 |
| RPRD1A       | -0,424086236 | 9,93E-13 | 2,39E-10 | Regulation Of Nuclear Pre-mRNA Domain Containing 1A                  |
| LOC399988    | -0,424573111 | 9,30E-13 | 2,27E-10 | Heat shock protein family A (Hsp70) member 8 pseudogene 5            |
| LOC648390    | -0,426621178 | 7,04E-13 | 1,76E-10 | Similar to ubiquitin B                                               |
| ATP5A1       | -0,427778752 | 6,01E-13 | 1,53E-10 | ATP Synthase F1 Subunit Alpha                                        |
| FAM195A      | -0,427866677 | 5,94E-13 | 1,52E-10 | MAPK Regulated Corepressor Interacting Protein 2                     |
| MRPL20       | -0,430153013 | 4,34E-13 | 1,17E-10 | Mitochondrial Ribosomal Protein L20                                  |
| MOCS2        | -0,430793323 | 3,97E-13 | 1,09E-10 | Molybdenum Cofactor Synthesis 2                                      |
| LOC284821    | -0,430913904 | 3,91E-13 | 1,08E-10 | Ribosomal protein L13a pseudogene 7                                  |
| LOC649049    | -0,431018428 | 3,85E-13 | 1,08E-10 | Similar to acidic ribosomal phosphoprotein P0                        |
| LOC100132717 | -0,431277237 | 3,72E-13 | 1,06E-10 | Hypothetical protein LOC100132717                                    |
| RPL13A       | -0,432133571 | 3,30E-13 | 9,47E-11 | Ribosomal Protein L13a                                               |
| DSCR3        | -0,434100309 | 2,51E-13 | 7,56E-11 | VPS26 Endosomal Protein Sorting Factor C                             |
| HINT1        | -0,434868109 | 2,25E-13 | 6,98E-11 | Histidine Triad Nucleotide Binding Protein 1                         |
| LOC148430    | -0,434941694 | 2,23E-13 | 6,98E-11 | Ribosomal protein S2 pseudogene                                      |
| EIF3F        | -0,436783494 | 1,72E-13 | 5,67E-11 | Eukaryotic Translation Initiation Factor 3 Subunit F                 |
| LYSMD2       | -0,437729902 | 1,51E-13 | 5,07E-11 | LysM Domain Containing 2                                             |
| CRADD        | -0,438315928 | 1,39E-13 | 4,72E-11 | CASP2 And RIPK1 Domain Containing Adaptor With Death Domain          |
| RPL34        | -0,438810942 | 1,29E-13 | 4,45E-11 | Ribosomal Protein L34                                                |
| LOC285053    | -0,439503142 | 1,17E-13 | 4,07E-11 | Ribosomal protein L18a pseudogene 6                                  |

|              |              |          |          |                                                                                                            |
|--------------|--------------|----------|----------|------------------------------------------------------------------------------------------------------------|
| MRPS33       | -0,440044926 | 1,08E-13 | 3,90E-11 | Mitochondrial Ribosomal Protein S33                                                                        |
| C1QBP        | -0,440167429 | 1,07E-13 | 3,88E-11 | Complement C1q Binding Protein                                                                             |
| LOC389203    | -0,441124801 | 9,30E-14 | 3,55E-11 | Small integral membrane protein 20                                                                         |
| RPS13        | -0,441558855 | 8,74E-14 | 3,38E-11 | Ribosomal Protein S13                                                                                      |
| FAM165B      | -0,441567392 | 8,73E-14 | 3,38E-11 | Small Integral Membrane Protein 11A                                                                        |
| LOC100129553 | -0,442062187 | 8,13E-14 | 3,22E-11 | Ribosomal protein L13a pseudogene 16                                                                       |
| LOC441775    | -0,44259501  | 7,53E-14 | 3,05E-11 | Ribosomal protein L18 pseudogene 13                                                                        |
| SLC25A3      | -0,443218794 | 6,89E-14 | 2,84E-11 | Solute Carrier Family 25 Member 3                                                                          |
| UQCRC1       | -0,443959016 | 6,19E-14 | 2,62E-11 | Ubiquinol-Cytochrome C Reductase, Rieske Iron-Sulfur Polypeptide 1                                         |
| RPLP0        | -0,444670705 | 5,58E-14 | 2,43E-11 | Ribosomal Protein Lateral Stalk Subunit P0                                                                 |
| LOC399804    | -0,446224129 | 4,46E-14 | 2,05E-11 | Nucleophosmin 1 pseudogene 25                                                                              |
| LOC387867    | -0,449106349 | 2,93E-14 | 1,39E-11 | Ribosomal protein SA pseudogene 12                                                                         |
| LOC648024    | -0,449262442 | 2,86E-14 | 1,39E-11 | Similar to eukaryotic translation initiation factor 4A, isoform 1                                          |
| LOC651436    | -0,451999967 | 1,91E-14 | 1,03E-11 | Similar to ribosomal protein L9                                                                            |
| LOC652624    | -0,452177352 | 1,86E-14 | 1,02E-11 | Ribosomal protein SA pseudogene 46                                                                         |
| LOC641844    | -0,453929676 | 1,43E-14 | 8,16E-12 | Similar to Succinate dehydrogenase [ubiquinone] cytochrome b small subunit, mitochondrial precursor (CybS) |
| LOC286444    | -0,454005275 | 1,42E-14 | 8,16E-12 | Ribosomal protein S2 pseudogene 55                                                                         |
| LOC100130562 | -0,454808542 | 1,26E-14 | 7,57E-12 | Ribosomal protein S2 pseudogene 5                                                                          |
| LOC440589    | -0,454933405 | 1,23E-14 | 7,57E-12 | Ribosomal protein S2 pseudogene 8                                                                          |
| SLC25A5      | -0,45548581  | 1,14E-14 | 7,11E-12 | Solute Carrier Family 25 Member 5                                                                          |
| LOC100128086 | -0,45606176  | 1,04E-14 | 6,75E-12 | APAF1 interacting protein pseudogene                                                                       |
| LOC729617    | -0,465916537 | 2,32E-15 | 1,77E-12 | Ribosomal protein L23a pseudogene 74                                                                       |
| RPL17        | -0,469235765 | 1,38E-15 | 1,11E-12 | Ribosomal Protein L17                                                                                      |
| AUH          | -0,469590919 | 1,31E-15 | 1,08E-12 | AU RNA Binding Methylglutaconyl-CoA Hydratase                                                              |
| ACP1         | -0,477478779 | 3,73E-16 | 3,99E-13 | Acid Phosphatase 1                                                                                         |
| LOC642817    | -0,483144697 | 1,49E-16 | 1,79E-13 | Uncharacterized LOC642817                                                                                  |
| RPS2         | -0,490932924 | 4,08E-17 | 5,32E-14 | Ribosomal Protein S2                                                                                       |
| LOC347544    | -0,491881917 | 3,47E-17 | 4,73E-14 | Ribosomal protein L18a pseudogene 16                                                                       |
| DPH5         | -0,492221142 | 3,28E-17 | 4,68E-14 | Diphthamide Biosynthesis 5                                                                                 |
| RPS4X        | -0,494702789 | 2,15E-17 | 3,37E-14 | Ribosomal Protein S4 X-Linked                                                                              |
| MTMR12       | -0,495791821 | 1,79E-17 | 3,11E-14 | Myotubularin Related Protein 12                                                                            |
| DCTPP1       | -0,503205939 | 4,96E-18 | 1,11E-14 | DCTP Pyrophosphatase 1                                                                                     |
| PRDX3        | -0,508702215 | 1,88E-18 | 5,88E-15 | Peroxiredoxin 3                                                                                            |
| ATP5F1       | -0,525538618 | 8,58E-20 | 4,47E-16 | ATP Synthase Peripheral Stalk-Membrane Subunit B                                                           |
| EEF1B2       | -0,532906366 | 2,10E-20 | 1,32E-16 | Eukaryotic Translation Elongation Factor 1 Beta 2                                                          |

| TCGA        |                         |          |                |                                             |
|-------------|-------------------------|----------|----------------|---------------------------------------------|
| Gene symbol | Correlation coefficient | p-value  | p-value adjust | Gene description                            |
| DVL3        | 0,604502803             | 3,26E-16 | 5,51E-12       | Dishevelled Segment Polarity Protein 3      |
| PTK7        | 0,591884389             | 1,88E-15 | 1,38E-11       | Protein Tyrosine Kinase 7                   |
| COL11A1     | 0,591649536             | 1,94E-15 | 1,38E-11       | Collagen Type XI Alpha 1 Chain              |
| RUNX1       | 0,59124053              | 2,05E-15 | 1,38E-11       | RUNX Family Transcription Factor 1          |
| BTBD19      | 0,58983932              | 2,47E-15 | 1,39E-11       | BTB Domain Containing 19                    |
| TRIO        | 0,577290794             | 1,29E-14 | 6,23E-11       | Trio Rho Guanine Nucleotide Exchange Factor |
| FN1         | 0,573453432             | 2,11E-14 | 8,49E-11       | Fibronectin 1                               |

|            |             |          |          |                                                                            |
|------------|-------------|----------|----------|----------------------------------------------------------------------------|
| SEMA4C     | 0,572891124 | 2,27E-14 | 8,49E-11 | Semaphorin 4C                                                              |
| DCBLD1     | 0,572083459 | 2,51E-14 | 8,49E-11 | Discoidin, CUB And LCCL Domain Containing 1                                |
| PPFIBP1    | 0,565440911 | 5,77E-14 | 1,56E-10 | PPFIA Binding Protein 1                                                    |
| LINC01561  | 0,565372857 | 5,82E-14 | 1,56E-10 | Long Intergenic Non-Protein Coding RNA 1561                                |
| SGIP1      | 0,565112951 | 6,01E-14 | 1,56E-10 | SH3GL Interacting Endocytic Adaptor 1                                      |
| NUAK1      | 0,563283572 | 7,54E-14 | 1,82E-10 | NUAK Family Kinase 1                                                       |
| RUNX2      | 0,560206124 | 1,10E-13 | 2,28E-10 | RUNX Family Transcription Factor 2                                         |
| ZNF532     | 0,560183506 | 1,10E-13 | 2,28E-10 | Zinc Finger Protein 532                                                    |
| KIAA1217   | 0,559609135 | 1,18E-13 | 2,28E-10 | KIAA1217                                                                   |
| ITGA11     | 0,559373584 | 1,22E-13 | 2,28E-10 | Integrin Subunit Alpha 11                                                  |
| LINC01429  | 0,556935296 | 1,63E-13 | 2,84E-10 | Long Intergenic Non-Protein Coding RNA 1429                                |
| ADAMTS7    | 0,556683495 | 1,68E-13 | 2,84E-10 | ADAM Metallopeptidase With Thrombospondin Type 1 Motif 7                   |
| SLC24A2    | 0,552886074 | 2,65E-13 | 4,26E-10 | Solute Carrier Family 24 Member 2                                          |
| MEX3A      | 0,55166318  | 3,06E-13 | 4,70E-10 | Mex-3 RNA Binding Family Member A                                          |
| SPOCD1     | 0,547652682 | 4,91E-13 | 7,15E-10 | SPOC Domain Containing 1                                                   |
| LINC01614  | 0,547357655 | 5,08E-13 | 7,15E-10 | Long Intergenic Non-Protein Coding RNA 1614                                |
| COL7A1     | 0,546867182 | 5,38E-13 | 7,23E-10 | Collagen Type VII Alpha 1 Chain                                            |
| KANK4      | 0,546298816 | 5,74E-13 | 7,23E-10 | KN Motif And Ankyrin Repeat Domains 4                                      |
| COL12A1    | 0,546242385 | 5,78E-13 | 7,23E-10 | Collagen Type XII Alpha 1 Chain                                            |
| CTHRC1     | 0,543822298 | 7,65E-13 | 9,23E-10 | Collagen Triple Helix Repeat Containing 1                                  |
| NCKAP5L    | 0,539625837 | 1,24E-12 | 1,44E-09 | NCK Associated Protein 5 Like                                              |
| COL10A1    | 0,536977216 | 1,67E-12 | 1,88E-09 | Collagen Type X Alpha 1 Chain                                              |
| CLTCL1     | 0,534634911 | 2,17E-12 | 2,37E-09 | Clathrin Heavy Chain Like 1                                                |
| IGFL4      | 0,534125959 | 2,30E-12 | 2,43E-09 | IGF Like Family Member 4                                                   |
| PLPP4      | 0,533260128 | 2,53E-12 | 2,59E-09 | Phospholipid Phosphatase 4                                                 |
| EPYC       | 0,532086023 | 2,88E-12 | 2,87E-09 | Epiphycan                                                                  |
| COL8A2     | 0,53098368  | 3,26E-12 | 3,14E-09 | Collagen Type VIII Alpha 2 Chain                                           |
| LRRC15     | 0,530193166 | 3,56E-12 | 3,34E-09 | Leucine Rich Repeat Containing 15                                          |
| C10orf55   | 0,529613462 | 3,79E-12 | 3,44E-09 | Chromosome 10 Open Reading Frame 55                                        |
| ADAMTS14   | 0,529415596 | 3,87E-12 | 3,44E-09 | ADAM Metallopeptidase With Thrombospondin Type 1 Motif 14                  |
| THBS2      | 0,527356746 | 4,85E-12 | 4,20E-09 | Thrombospondin 2                                                           |
| SPATA20P1  | 0,526511752 | 5,32E-12 | 4,49E-09 | Spermatogenesis Associated 20 Pseudogene 1                                 |
| POFUT2     | 0,525111139 | 6,20E-12 | 5,11E-09 | Protein O-Fucosyltransferase 2                                             |
| INTU       | 0,524204612 | 6,83E-12 | 5,37E-09 | Inturned Planar Cell Polarity Protein                                      |
| RAI14      | 0,524093253 | 6,92E-12 | 5,37E-09 | Retinoic Acid Induced 14                                                   |
| YEATS2     | 0,5239849   | 7,00E-12 | 5,37E-09 | YEATS Domain Containing 2                                                  |
| INPPL1     | 0,522447431 | 8,26E-12 | 6,20E-09 | Inositol Polyphosphate Phosphatase Like 1                                  |
| STAT2      | 0,521031672 | 9,61E-12 | 7,06E-09 | Signal Transducer And Activator Of Transcription 2                         |
| CNIH3      | 0,520584762 | 1,01E-11 | 7,25E-09 | Cornichon Family AMPA Receptor Auxiliary Protein 3                         |
| ADAMTS6    | 0,520342497 | 1,03E-11 | 7,28E-09 | ADAM Metallopeptidase With Thrombospondin Type 1 Motif 6                   |
| STARD4-AS1 | 0,519270032 | 1,16E-11 | 7,86E-09 | TARD4 Antisense RNA 1                                                      |
| GJB2       | 0,519242441 | 1,16E-11 | 7,86E-09 | Gap Junction Protein Beta 2                                                |
| ARHGEF17   | 0,517980344 | 1,33E-11 | 8,81E-09 | Rho Guanine Nucleotide Exchange Factor 17                                  |
| MICAL2     | 0,517384403 | 1,42E-11 | 9,20E-09 | Microtubule Associated Monooxygenase, Calponin And LIM Domain Containing 2 |
| SHANK1     | 0,516004388 | 1,64E-11 | 1,04E-08 | SH3 And Multiple Ankyrin Repeat Domains 1                                  |
| MMP14      | 0,514560207 | 1,91E-11 | 1,19E-08 | Matrix Metallopeptidase 14                                                 |



|           |             |          |          |                                                                 |
|-----------|-------------|----------|----------|-----------------------------------------------------------------|
| MINDY2    | 0,513109235 | 2,22E-11 | 1,36E-08 | MINDY Lysine 48 Deubiquitinase 2                                |
| ANTXR1    | 0,509698981 | 3,16E-11 | 1,89E-08 | ANTXR Cell Adhesion Molecule 1                                  |
| MEX3B     | 0,509587313 | 3,20E-11 | 1,89E-08 | Mex-3 RNA Binding Family Member B                               |
| NTM       | 0,508743922 | 3,49E-11 | 2,00E-08 | Neurotrimin                                                     |
| CASC15    | 0,508736153 | 3,49E-11 | 2,00E-08 | Cancer Susceptibility 15                                        |
| MXRA5     | 0,50830795  | 3,65E-11 | 2,05E-08 | Matrix Remodeling Associated 5                                  |
| MXRA8     | 0,507669527 | 3,89E-11 | 2,16E-08 | Matrix Remodeling Associated 8                                  |
| COL5A1    | 0,507399694 | 4,00E-11 | 2,17E-08 | Collagen Type V Alpha 1 Chain                                   |
| KIF26B    | 0,50713357  | 4,11E-11 | 2,17E-08 | Kinesin Family Member 26B                                       |
| ATXN1     | 0,507090173 | 4,13E-11 | 2,17E-08 | Ataxin 1                                                        |
| PLEKHG2   | 0,506975354 | 4,18E-11 | 2,17E-08 | Pleckstrin Homology And RhoGEF Domain Containing G2             |
| CMTM3     | 0,506606601 | 4,34E-11 | 2,22E-08 | CKLF Like MARVEL Transmembrane Domain Containing 3              |
| SLC26A10  | 0,506021234 | 4,61E-11 | 2,32E-08 | Solute Carrier Family 26 Member 10                              |
| LOXL2     | 0,505630751 | 4,79E-11 | 2,38E-08 | Lysyl Oxidase Like 2                                            |
| FAM225B   | 0,505193061 | 5,01E-11 | 2,45E-08 | Family With Sequence Similarity 225 Member B                    |
| SLC6A1    | 0,504534462 | 5,36E-11 | 2,54E-08 | Solute Carrier Family 6 Member 1                                |
| FAT3      | 0,5045318   | 5,36E-11 | 2,54E-08 | FAT Atypical Cadherin 3                                         |
| GPR176    | 0,504416406 | 5,42E-11 | 2,54E-08 | G Protein-Coupled Receptor 176                                  |
| SSH1      | 0,504035425 | 5,64E-11 | 2,61E-08 | Slingshot Protein Phosphatase 1                                 |
| AEBP1     | 0,503428548 | 5,99E-11 | 2,74E-08 | AE Binding Protein 1                                            |
| NLGN2     | 0,502909536 | 6,32E-11 | 2,84E-08 | Neuroigin 2                                                     |
| UBE2Q2P1  | 0,500403324 | 8,12E-11 | 3,61E-08 | Ubiquitin Conjugating Enzyme E2 Q2 Pseudogene 1                 |
| CDH11     | 0,499397283 | 8,98E-11 | 3,94E-08 | Cadherin 11                                                     |
| POSTN     | 0,499217451 | 9,14E-11 | 3,96E-08 | Periostin                                                       |
| COL8A1    | 0,498917822 | 9,42E-11 | 4,03E-08 | Collagen Type VIII Alpha 1 Chain                                |
| ADAMTS12  | 0,498675044 | 9,65E-11 | 4,08E-08 | ADAM Metallopeptidase With Thrombospondin Type 1 Motif 12       |
| PHF21A    | 0,498058484 | 1,03E-10 | 4,28E-08 | PHD Finger Protein 21A                                          |
| LOXL3     | 0,497789895 | 1,05E-10 | 4,34E-08 | Lysyl Oxidase Like 3                                            |
| BMP1      | 0,497291675 | 1,11E-10 | 4,51E-08 | Bone Morphogenetic Protein 1                                    |
| MRC2      | 0,496509636 | 1,20E-10 | 4,77E-08 | Mannose Receptor C Type 2                                       |
| HOXB3     | 0,49648139  | 1,20E-10 | 4,77E-08 | Homeobox B3                                                     |
| NBPF9     | 0,495801077 | 1,28E-10 | 4,98E-08 | NBPF Member 9                                                   |
| HSD17B6   | 0,495800882 | 1,28E-10 | 4,98E-08 | Hydroxysteroid 17-Beta Dehydrogenase 6                          |
| NOTCH3    | 0,495590722 | 1,31E-10 | 5,03E-08 | Notch Receptor 3                                                |
| VGLL4     | 0,494753603 | 1,42E-10 | 5,40E-08 | Vestigial Like Family Member 4                                  |
| INHBA     | 0,49228157  | 1,81E-10 | 6,80E-08 | Inhibin Subunit Beta A                                          |
| ZCCHC14   | 0,491326974 | 1,99E-10 | 7,25E-08 | Zinc Finger CCHC-Type Containing 14                             |
| IRS1      | 0,491304968 | 1,99E-10 | 7,25E-08 | Insulin Receptor Substrate 1                                    |
| RAD51AP2  | 0,491239191 | 2,00E-10 | 7,25E-08 | RAD51 Associated Protein 2                                      |
| MIR4635   | 0,491178883 | 2,02E-10 | 7,25E-08 | MicroRNA 4635                                                   |
| SOX11     | 0,490280442 | 2,20E-10 | 7,82E-08 | SRY-Box Transcription Factor 11                                 |
| NKD2      | 0,490140102 | 2,23E-10 | 7,85E-08 | NKD Inhibitor Of WNT Signaling Pathway 2                        |
| SPOCK1    | 0,489980165 | 2,26E-10 | 7,89E-08 | SPARC (Osteonectin), Cwcv And Kazal Like Domains Proteoglycan 1 |
| CYTH3     | 0,489834776 | 2,30E-10 | 7,92E-08 | Cytohesin 3                                                     |
| MFAP2     | 0,488069514 | 2,72E-10 | 9,29E-08 | Microfibril Associated Protein 2                                |
| ACTA2-AS1 | 0,486644362 | 3,12E-10 | 1,05E-07 | ACTA2 Antisense RNA 1                                           |

|           |             |          |          |                                                                 |
|-----------|-------------|----------|----------|-----------------------------------------------------------------|
| RN7SKP296 | 0,486475443 | 3,17E-10 | 1,06E-07 | RN7SK Pseudogene 296                                            |
| ZNF469    | 0,486271669 | 3,23E-10 | 1,07E-07 | Zinc Finger Protein 469                                         |
| SULF1     | 0,486161923 | 3,27E-10 | 1,07E-07 | Sulfatase 1                                                     |
| SETD5     | 0,485977408 | 3,33E-10 | 1,08E-07 | SET Domain Containing 5                                         |
| ARL4C     | 0,485711219 | 3,41E-10 | 1,10E-07 | ADP Ribosylation Factor Like GTPase 4C                          |
| PTPN14    | 0,484147502 | 3,96E-10 | 1,26E-07 | Protein Tyrosine Phosphatase Non-Receptor Type 14               |
| FZD1      | 0,48363504  | 4,16E-10 | 1,31E-07 | Frizzled Class Receptor 1                                       |
| IGF1R     | 0,483463943 | 4,23E-10 | 1,32E-07 | Insulin Like Growth Factor 1 Receptor                           |
| HOOK3     | 0,481748326 | 4,97E-10 | 1,54E-07 | Hook Microtubule Tethering Protein 3                            |
| PRSS53    | 0,481332583 | 5,17E-10 | 1,59E-07 | Serine Protease 53                                              |
| FAP       | 0,480734638 | 5,47E-10 | 1,66E-07 | Fibroblast Activation Protein Alpha                             |
| LINC00922 | 0,480328933 | 5,68E-10 | 1,71E-07 | Long Intergenic Non-Protein Coding RNA 922                      |
| NKX3-2    | 0,48022535  | 5,73E-10 | 1,71E-07 | NK3 Homeobox 2                                                  |
| COL1A1    | 0,48001739  | 5,85E-10 | 1,73E-07 | Collagen Type I Alpha 1 Chain                                   |
| LEF1-AS1  | 0,479950048 | 5,88E-10 | 1,73E-07 | LEF1 Antisense RNA 1                                            |
| MANBA     | 0,479274226 | 6,27E-10 | 1,82E-07 | Mannosidase Beta                                                |
| COL5A2    | 0,478943097 | 6,46E-10 | 1,87E-07 | Collagen Type V Alpha 2 Chain                                   |
| HOXB4     | 0,478119537 | 6,98E-10 | 1,98E-07 | Homeobox B4                                                     |
| METTL11B  | 0,47810701  | 6,99E-10 | 1,98E-07 | Methyltransferase Like 11B                                      |
| RBMS2     | 0,477722326 | 7,24E-10 | 2,04E-07 | RNA Binding Motif Single Stranded Interacting Protein 2         |
| TNFSF4    | 0,47607893  | 8,43E-10 | 2,35E-07 | TNF Superfamily Member 4                                        |
| IGFL3     | 0,474530975 | 9,73E-10 | 2,69E-07 | IGF Like Family Member 3                                        |
| MAPKBP1   | 0,474457525 | 9,79E-10 | 2,69E-07 | Mitogen-Activated Protein Kinase Binding Protein 1              |
| UNC5B     | 0,473859346 | 1,03E-09 | 2,82E-07 | Unc-5 Netrin Receptor B                                         |
| PLXNA1    | 0,473537825 | 1,07E-09 | 2,86E-07 | Plexin A1                                                       |
| ZSWIM4    | 0,473504978 | 1,07E-09 | 2,86E-07 | Zinc Finger SWIM-Type Containing 4                              |
| MYHAS     | 0,473452978 | 1,07E-09 | 2,86E-07 | Myosin Heavy Chain Gene Cluster Antisense RNA                   |
| SYNGAP1   | 0,473341054 | 1,09E-09 | 2,86E-07 | Synaptic Ras GTPase Activating Protein 1                        |
| C1QTNF6   | 0,472944728 | 1,13E-09 | 2,95E-07 | C1q And TNF Related 6                                           |
| PPFIA4    | 0,472473922 | 1,17E-09 | 3,04E-07 | PTPRF Interacting Protein Alpha 4                               |
| TIMP2     | 0,472412792 | 1,18E-09 | 3,04E-07 | TIMP Metallopeptidase Inhibitor 2                               |
| SCUBE3    | 0,472278535 | 1,20E-09 | 3,04E-07 | Signal Peptide, CUB Domain And EGF Like Domain Containing 3     |
| MAML2     | 0,472210948 | 1,20E-09 | 3,04E-07 | Mastermind Like Transcriptional Coactivator 2                   |
| FZD7      | 0,472189661 | 1,21E-09 | 3,04E-07 | Frizzled Class Receptor 7                                       |
| ADAM12    | 0,471885241 | 1,24E-09 | 3,10E-07 | ADAM Metallopeptidase Domain 12                                 |
| COL24A1   | 0,471622491 | 1,27E-09 | 3,15E-07 | Collagen Type XXIV Alpha 1 Chain                                |
| NOX4      | 0,470864644 | 1,36E-09 | 3,34E-07 | NADPH Oxidase 4                                                 |
| TANC2     | 0,470817937 | 1,37E-09 | 3,34E-07 | NADPH Oxidase 4                                                 |
| RFX8      | 0,470675245 | 1,38E-09 | 3,36E-07 | RFX Family Member 8, Lacking RFX DNA Binding Domain             |
| KIRREL    | 0,470153755 | 1,45E-09 | 3,50E-07 | Kirre Like Nephrin Family Adhesion Molecule 1                   |
| DOCK1     | 0,469820431 | 1,50E-09 | 3,58E-07 | Dedicator Of Cytokinesis 1                                      |
| SAMD4B    | 0,46955248  | 1,53E-09 | 3,65E-07 | Sterile Alpha Motif Domain Containing 4B                        |
| FNDC1     | 0,468615392 | 1,67E-09 | 3,92E-07 | Fibronectin Type III Domain Containing 1                        |
| LIMS1     | 0,468590757 | 1,67E-09 | 3,92E-07 | LIM Zinc Finger Domain Containing 1                             |
| PACERR    | 0,468216608 | 1,73E-09 | 4,03E-07 | PTGS2 Antisense NFKB1 Complex-Mediated Expression Regulator RNA |
| RASAL2    | 0,46810162  | 1,75E-09 | 4,04E-07 | RAS Protein Activator Like 2                                    |

|           |             |          |          |                                                              |
|-----------|-------------|----------|----------|--------------------------------------------------------------|
| USP32P3   | 0,467820507 | 1,79E-09 | 4,12E-07 | Ubiquitin Specific Peptidase 32 Pseudogene 3                 |
| DLX5      | 0,467752962 | 1,80E-09 | 4,12E-07 | Distal-Less Homeobox 5                                       |
| C1QTNF3   | 0,46759919  | 1,83E-09 | 4,14E-07 | C1q And TNF Related 3                                        |
| KLK4      | 0,467329486 | 1,87E-09 | 4,22E-07 | Kallikrein Related Peptidase 4                               |
| COL6A3    | 0,467214064 | 1,89E-09 | 4,23E-07 | Collagen Type VI Alpha 3 Chain                               |
| ICAM5     | 0,466495378 | 2,02E-09 | 4,47E-07 | Intercellular Adhesion Molecule 5                            |
| PXDN      | 0,466467897 | 2,02E-09 | 4,47E-07 | Peroxidasin                                                  |
| TMEM158   | 0,466125052 | 2,09E-09 | 4,54E-07 | Transmembrane Protein 158                                    |
| LINC01705 | 0,466090688 | 2,09E-09 | 4,54E-07 | Long Intergenic Non-Protein Coding RNA 1705                  |
| TRIM59    | 0,466068562 | 2,10E-09 | 4,54E-07 | Tripartite Motif Containing 59                               |
| PIAS3     | 0,466009709 | 2,11E-09 | 4,54E-07 | Protein Inhibitor Of Activated STAT 3                        |
| USP35     | 0,465334623 | 2,24E-09 | 4,79E-07 | Ubiquitin Specific Peptidase 35                              |
| MYH9      | 0,464467844 | 2,42E-09 | 5,14E-07 | Myosin Heavy Chain 9                                         |
| RNU6-403P | 0,464374278 | 2,44E-09 | 5,15E-07 | RNA, U6 Small Nuclear 403, Pseudogene                        |
| APBB2     | 0,464217577 | 2,47E-09 | 5,19E-07 | Amyloid Beta Precursor Protein Binding Family B Member 2     |
| VCAN      | 0,463977359 | 2,53E-09 | 5,27E-07 | Versican                                                     |
| TENM4     | 0,463630788 | 2,61E-09 | 5,40E-07 | Teneurin Transmembrane Protein 4                             |
| IGFL2     | 0,463476769 | 2,64E-09 | 5,44E-07 | IGF Like Family Member 2                                     |
| ST8SIA2   | 0,462797222 | 2,81E-09 | 5,71E-07 | ST8 Alpha-N-Acetyl-Neuraminide Alpha-2,8-Sialyltransferase 2 |
| TWIST1    | 0,462678125 | 2,84E-09 | 5,71E-07 | Twist Family BHLH Transcription Factor 1                     |
| LATS2     | 0,462657648 | 2,84E-09 | 5,71E-07 | Large Tumor Suppressor Kinase 2                              |
| ANOS1     | 0,462634731 | 2,85E-09 | 5,71E-07 | Anosmin 1                                                    |
| BMP8A     | 0,462597046 | 2,86E-09 | 5,71E-07 | Bone Morphogenetic Protein 8a                                |
| PIP4K2B   | 0,462373586 | 2,91E-09 | 5,79E-07 | Phosphatidylinositol-5-Phosphate 4-Kinase Type 2 Beta        |
| RASA2     | 0,462141015 | 2,97E-09 | 5,88E-07 | RAS P21 Protein Activator 2                                  |
| SLC12A4   | 0,46197346  | 3,02E-09 | 5,91E-07 | Solute Carrier Family 12 Member 4                            |
| ZNF496    | 0,461938899 | 3,03E-09 | 5,91E-07 | Zinc Finger Protein 496                                      |
| AZIN2     | 0,461876777 | 3,05E-09 | 5,91E-07 | Antizyme Inhibitor 2                                         |
| COL1A2    | 0,461616047 | 3,12E-09 | 6,02E-07 | Collagen Type I Alpha 2 Chain                                |
| CTDSP2    | 0,461119828 | 3,26E-09 | 6,25E-07 | CTD Small Phosphatase 2                                      |
| PHC1      | 0,460730752 | 3,37E-09 | 6,43E-07 | Polyhomeotic Homolog 1                                       |
| FARP1     | 0,460402979 | 3,47E-09 | 6,58E-07 | FERM, ARH/RhoGEF And Pleckstrin Domain Protein 1             |
| SLC25A36  | 0,460295663 | 3,50E-09 | 6,61E-07 | Solute Carrier Family 25 Member 36                           |
| UCN2      | 0,460168013 | 3,54E-09 | 6,64E-07 | Urocortin 2                                                  |
| CNN2      | 0,459645371 | 3,71E-09 | 6,92E-07 | Calponin 2                                                   |
| ARAP1-AS2 | 0,458977909 | 3,93E-09 | 7,29E-07 | ARAP1 Antisense RNA 2                                        |
| RTEL1     | 0,458615537 | 4,06E-09 | 7,49E-07 | Regulator Of Telomere Elongation Helicase 1                  |
| SYDE1     | 0,458476416 | 4,11E-09 | 7,54E-07 | Synapse Defective Rho GTPase Homolog 1                       |
| APBA2     | 0,458300765 | 4,17E-09 | 7,61E-07 | Amyloid Beta Precursor Protein Binding Family A Member 2     |
| GOLGA6L5P | 0,457348286 | 4,53E-09 | 8,23E-07 | Golgin A6 Family Like 5, Pseudogene                          |
| CD276     | 0,457214105 | 4,58E-09 | 8,28E-07 | CD276 Molecule                                               |
| RYK       | 0,457050903 | 4,65E-09 | 8,35E-07 | Receptor Like Tyrosine Kinase                                |
| PODNL1    | 0,456691371 | 4,80E-09 | 8,57E-07 | Podocan Like 1                                               |
| PCDH7     | 0,456361121 | 4,94E-09 | 8,75E-07 | Protocadherin 7                                              |
| SMO       | 0,456275221 | 4,97E-09 | 8,75E-07 | Smoothened, Frizzled Class Receptor                          |
| DTX3      | 0,456274939 | 4,97E-09 | 8,75E-07 | Deltex E3 Ubiquitin Ligase 3                                 |

|           |             |          |          |                                                                 |
|-----------|-------------|----------|----------|-----------------------------------------------------------------|
| MMP11     | 0,455838004 | 5,17E-09 | 9,04E-07 | Matrix Metallopeptidase 11                                      |
| HTRA1     | 0,454903699 | 5,60E-09 | 9,75E-07 | HtrA Serine Peptidase 1                                         |
| MEIS3     | 0,454788601 | 5,66E-09 | 9,80E-07 | Meis Homeobox 3                                                 |
| MIAT      | 0,454080319 | 6,01E-09 | 1,04E-06 | Myocardial Infarction Associated Transcript                     |
| PRKAB2    | 0,453907643 | 6,10E-09 | 1,05E-06 | Protein Kinase AMP-Activated Non-Catalytic Subunit Beta 2       |
| CRAMP1    | 0,453631087 | 6,25E-09 | 1,07E-06 | Cramped Chromatin Regulator Homolog 1                           |
| CSMD2     | 0,453400296 | 6,37E-09 | 1,08E-06 | CUB And Sushi Multiple Domains 2                                |
| LINC01449 | 0,453235029 | 6,47E-09 | 1,09E-06 | Long Intergenic Non-Protein Coding RNA 1449                     |
| NUMA1     | 0,453145968 | 6,52E-09 | 1,10E-06 | Nuclear Mitotic Apparatus Protein 1                             |
| CYP27C1   | 0,452959886 | 6,62E-09 | 1,11E-06 | Cytochrome P450 Family 27 Subfamily C Member 1                  |
| FRMD6     | 0,452911109 | 6,65E-09 | 1,11E-06 | FERM Domain Containing 6                                        |
| LAMB1     | 0,452558334 | 6,85E-09 | 1,13E-06 | Laminin Subunit Beta 1                                          |
| GLIS2     | 0,45251407  | 6,88E-09 | 1,13E-06 | GLIS Family Zinc Finger 2                                       |
| KDM2A     | 0,452380129 | 6,96E-09 | 1,14E-06 | Lysine Demethylase 2A                                           |
| ADAM19    | 0,452371861 | 6,96E-09 | 1,14E-06 | ADAM Metallopeptidase Domain 19                                 |
| PLOD2     | 0,452201506 | 7,07E-09 | 1,15E-06 | Procollagen-Lysine,2-Oxoglutarate 5-Dioxygenase 2               |
| IGFBP3    | 0,451818775 | 7,30E-09 | 1,18E-06 | Insulin Like Growth Factor Binding Protein 3                    |
| DNAH17    | 0,450968703 | 7,85E-09 | 1,26E-06 | Dynein Axonemal Heavy Chain 17                                  |
| WNT2      | 0,45096612  | 7,85E-09 | 1,26E-06 | Wnt Family Member 2                                             |
| GLIS1     | 0,450843153 | 7,93E-09 | 1,26E-06 | GLIS Family Zinc Finger 1                                       |
| MPRIP     | 0,45081549  | 7,95E-09 | 1,26E-06 | Myosin Phosphatase Rho Interacting Protein                      |
| TEAD3     | 0,450759424 | 7,99E-09 | 1,26E-06 | TEA Domain Transcription Factor 3                               |
| GLI3      | 0,450713552 | 8,02E-09 | 1,26E-06 | GLI Family Zinc Finger 3                                        |
| PPEF1     | 0,45062292  | 8,09E-09 | 1,26E-06 | Protein Phosphatase With EF-Hand Domain 1                       |
| PLAU      | 0,450179325 | 8,40E-09 | 1,31E-06 | Plasminogen Activator, Urokinase                                |
| NPR2      | 0,44992643  | 8,58E-09 | 1,33E-06 | Natriuretic Peptide Receptor 2                                  |
| C2orf27A  | 0,449782902 | 8,68E-09 | 1,34E-06 | Chromosome 2 Open Reading Frame 27A                             |
| SERPINH1  | 0,449559388 | 8,85E-09 | 1,35E-06 | Serpin Family H Member 1                                        |
| YPEL4     | 0,449546402 | 8,86E-09 | 1,35E-06 | Yippee Like 4                                                   |
| SLC6A6    | 0,449329302 | 9,03E-09 | 1,37E-06 | Solute Carrier Family 6 Member 6                                |
| LINC01711 | 0,449253061 | 9,08E-09 | 1,38E-06 | Long Intergenic Non-Protein Coding RNA 1711                     |
| ZNF512B   | 0,448938253 | 9,33E-09 | 1,41E-06 | Zinc Finger Protein 512B                                        |
| UAP1L1    | 0,448471363 | 9,71E-09 | 1,46E-06 | UDP-N-Acetylglucosamine Pyrophosphorylase 1 Like 1              |
| ZC2HC1A   | 0,447971452 | 1,01E-08 | 1,51E-06 | Zinc Finger C2HC-Type Containing 1A                             |
| LLGL1     | 0,447853808 | 1,02E-08 | 1,52E-06 | LLGL Scribble Cell Polarity Complex Component 1                 |
| WDR86     | 0,447785785 | 1,03E-08 | 1,52E-06 | WD Repeat Domain 86                                             |
| GPR68     | 0,447755757 | 1,03E-08 | 1,52E-06 | G Protein-Coupled Receptor 68                                   |
| EFEMP2    | 0,447441971 | 1,06E-08 | 1,55E-06 | EGF Containing Fibulin Extracellular Matrix Protein 2           |
| EFS       | 0,447416998 | 1,06E-08 | 1,55E-06 | Embryonal Fyn-Associated Substrate                              |
| TIMP3     | 0,447148412 | 1,09E-08 | 1,58E-06 | TIMP Metallopeptidase Inhibitor 3                               |
| WDR19     | 0,447137817 | 1,09E-08 | 1,58E-06 | WD Repeat Domain 19                                             |
| FNDC3B    | 0,44687069  | 1,11E-08 | 1,60E-06 | Fibronectin Type III Domain Containing 3B                       |
| TBX19     | 0,446696909 | 1,13E-08 | 1,62E-06 | T-Box Transcription Factor 19                                   |
| CTIF      | 0,446529038 | 1,14E-08 | 1,63E-06 | Cap Binding Complex Dependent Translation Initiation Factor     |
| HECW1     | 0,446497027 | 1,15E-08 | 1,63E-06 | HECT, C2 And WW Domain Containing E3 Ubiquitin Protein Ligase 1 |
| WTIP      | 0,445669904 | 1,23E-08 | 1,74E-06 | WT1 Interacting Protein                                         |

|           |             |          |          |                                                           |
|-----------|-------------|----------|----------|-----------------------------------------------------------|
| ADGRB2    | 0,445449905 | 1,25E-08 | 1,77E-06 | Adhesion G Protein-Coupled Receptor B2                    |
| SKI       | 0,445215704 | 1,28E-08 | 1,80E-06 | SKI Proto-Oncogene                                        |
| KIF7      | 0,445072318 | 1,29E-08 | 1,80E-06 | Kinesin Family Member 7                                   |
| FKBP9     | 0,445043929 | 1,30E-08 | 1,80E-06 | FKBP Prolyl Isomerase 9                                   |
| RNF144A   | 0,445027885 | 1,30E-08 | 1,80E-06 | Ring Finger Protein 144A                                  |
| FAM225A   | 0,444600702 | 1,34E-08 | 1,86E-06 | Family With Sequence Similarity 225 Member A              |
| LEF1      | 0,444354365 | 1,37E-08 | 1,89E-06 | Lymphoid Enhancer Binding Factor 1                        |
| TNS3      | 0,444059308 | 1,41E-08 | 1,92E-06 | Tensin 3                                                  |
| ISLR      | 0,444054632 | 1,41E-08 | 1,92E-06 | Immunoglobulin Superfamily Containing Leucine Rich Repeat |
| BICD2     | 0,444035744 | 1,41E-08 | 1,92E-06 | BICD Cargo Adaptor 2                                      |
| RAB31     | 0,443775956 | 1,44E-08 | 1,95E-06 | RAB31, Member RAS Oncogene Family                         |
| PLCG1     | 0,443755841 | 1,44E-08 | 1,95E-06 | Phospholipase C Gamma 1                                   |
| DLG5      | 0,443516252 | 1,47E-08 | 1,98E-06 | Discs Large MAGUK Scaffold Protein 5                      |
| AMZ1      | 0,443319431 | 1,50E-08 | 1,99E-06 | Archaeolysin Family Metallopeptidase 1                    |
| TIA1      | 0,443315548 | 1,50E-08 | 1,99E-06 | TIA1 Cytotoxic Granule Associated RNA Binding Protein     |
| ZNF281    | 0,443291192 | 1,50E-08 | 1,99E-06 | Zinc Finger Protein 281                                   |
| SCARF2    | 0,443232315 | 1,51E-08 | 2,00E-06 | Scavenger Receptor Class F Member 2                       |
| GALNS     | 0,442964298 | 1,54E-08 | 2,03E-06 | Galactosamine (N-Acetyl)-6-Sulfatase                      |
| NBPF15    | 0,442464904 | 1,61E-08 | 2,11E-06 | NBPF Member 15                                            |
| ASAP1     | 0,442185465 | 1,64E-08 | 2,15E-06 | ArfGAP With SH3 Domain, Ankyrin Repeat And PH Domain 1    |
| SH3PXD2B  | 0,442117062 | 1,65E-08 | 2,16E-06 | SH3 And PX Domains 2B                                     |
| ITGB5     | 0,441895032 | 1,68E-08 | 2,19E-06 | Integrin Subunit Beta 5                                   |
| NAB2      | 0,441825715 | 1,69E-08 | 2,19E-06 | NGFI-A Binding Protein 2                                  |
| PDGFC     | 0,441392565 | 1,75E-08 | 2,25E-06 | Platelet Derived Growth Factor C                          |
| STK36     | 0,441334182 | 1,76E-08 | 2,25E-06 | Serine/Threonine Kinase 36                                |
| HOXB8     | 0,441332462 | 1,76E-08 | 2,25E-06 | Homeobox B8                                               |
| EDNRA     | 0,441324285 | 1,76E-08 | 2,25E-06 | Endothelin Receptor Type A                                |
| LOXL1     | 0,441303101 | 1,77E-08 | 2,25E-06 | Lysyl Oxidase Like 1                                      |
| HOXB-AS2  | 0,441059968 | 1,80E-08 | 2,28E-06 | HOXB Cluster Antisense RNA 2                              |
| BCORL1    | 0,440959654 | 1,82E-08 | 2,29E-06 | BCL6 Corepressor Like 1                                   |
| PHF12     | 0,440847533 | 1,84E-08 | 2,31E-06 | PHD Finger Protein 12                                     |
| VSNL1     | 0,440723175 | 1,85E-08 | 2,32E-06 | Visinin Like 1                                            |
| FAM19A5   | 0,440683712 | 1,86E-08 | 2,32E-06 | TAFA Chemokine Like Family Member 5                       |
| IGFL1P1   | 0,440596854 | 1,87E-08 | 2,33E-06 | IGF Like Family Member 1 Pseudogene 1                     |
| VCAN-AS1  | 0,440203146 | 1,94E-08 | 2,39E-06 | VCAN Antisense RNA 1                                      |
| WISP1     | 0,440168109 | 1,94E-08 | 2,39E-06 | Cellular Communication Network Factor 4                   |
| CCDC93    | 0,440070168 | 1,96E-08 | 2,40E-06 | Coiled-Coil Domain Containing 93                          |
| PRDM6     | 0,439658767 | 2,02E-08 | 2,48E-06 | PR/SET Domain 6                                           |
| TBX5-AS1  | 0,438972007 | 2,14E-08 | 2,61E-06 | TBX5 Antisense RNA 1                                      |
| DNMT3A    | 0,438960228 | 2,14E-08 | 2,61E-06 | DNA Methyltransferase 3 Alpha                             |
| ANKRD36   | 0,438782044 | 2,18E-08 | 2,63E-06 | Ankyrin Repeat Domain 36                                  |
| DCAF5     | 0,438576059 | 2,21E-08 | 2,67E-06 | DDB1 And CUL4 Associated Factor 5                         |
| LINC01450 | 0,438189748 | 2,28E-08 | 2,75E-06 | Long Intergenic Non-Protein Coding RNA 1450               |
| KLF7      | 0,43777792  | 2,36E-08 | 2,83E-06 | Kruppel Like Factor 7                                     |
| LINC00506 | 0,437322938 | 2,45E-08 | 2,93E-06 | Long Intergenic Non-Protein Coding RNA 506                |
| LINC01655 | 0,437246462 | 2,47E-08 | 2,93E-06 | Long Intergenic Non-Protein Coding RNA 1655               |

|           |             |          |          |                                                                    |
|-----------|-------------|----------|----------|--------------------------------------------------------------------|
| TMEM200A  | 0,436775169 | 2,56E-08 | 3,04E-06 | Transmembrane Protein 200A                                         |
| NBPF8     | 0,436198499 | 2,69E-08 | 3,17E-06 | NBPF Member 8                                                      |
| CTSK      | 0,436146166 | 2,70E-08 | 3,17E-06 | Cathepsin K                                                        |
| PKD1L2    | 0,436136407 | 2,70E-08 | 3,17E-06 | Polycystin 1 Like 2 (Gene/Pseudogene)                              |
| ZMYM3     | 0,435709882 | 2,80E-08 | 3,27E-06 | Zinc Finger MYM-Type Containing 3                                  |
| ALPK2     | 0,435536368 | 2,84E-08 | 3,30E-06 | Alpha Kinase 2                                                     |
| CLASP1    | 0,435127888 | 2,93E-08 | 3,40E-06 | Cytoplasmic Linker Associated Protein 1                            |
| RBFOX2    | 0,435026816 | 2,96E-08 | 3,41E-06 | RNA Binding Fox-1 Homolog 2                                        |
| AMIGO2    | 0,435021692 | 2,96E-08 | 3,41E-06 | Adhesion Molecule With Ig Like Domain 2                            |
| TMEM200B  | 0,434850996 | 3,00E-08 | 3,44E-06 | Transmembrane Protein 200B                                         |
| ANKH      | 0,43458978  | 3,06E-08 | 3,51E-06 | ANKH Inorganic Pyrophosphate Transport Regulator                   |
| ZFHX4     | 0,434332982 | 3,13E-08 | 3,57E-06 | Zinc Finger Homeobox 4                                             |
| HIP1      | 0,43341943  | 3,37E-08 | 3,82E-06 | Huntingtin Interacting Protein 1                                   |
| MYOSLID   | 0,433402794 | 3,37E-08 | 3,82E-06 | Myocardin-Induced Smooth Muscle LncRNA, Inducer Of Differentiation |
| COL3A1    | 0,432782022 | 3,54E-08 | 4,00E-06 | Collagen Type III Alpha 1 Chain                                    |
| ZNF23     | 0,432653911 | 3,58E-08 | 4,02E-06 | Zinc Finger Protein 23                                             |
| ARL10     | 0,432633149 | 3,59E-08 | 4,02E-06 | ADP Ribosylation Factor Like GTPase 10                             |
| WDR27     | 0,432081497 | 3,75E-08 | 4,19E-06 | WD Repeat Domain 27                                                |
| PRPF40B   | 0,432005371 | 3,77E-08 | 4,20E-06 | Pre-mRNA Processing Factor 40 Homolog B                            |
| TET1      | 0,431782112 | 3,84E-08 | 4,27E-06 | Tet Methylcytosine Dioxygenase 1                                   |
| SPECC1    | 0,431720124 | 3,86E-08 | 4,27E-06 | Sperm Antigen With Calponin Homology And Coiled-Coil Domains 1     |
| ISM1      | 0,431271152 | 4,00E-08 | 4,41E-06 | Isthmin 1                                                          |
| ZC3HAV1L  | 0,430896658 | 4,12E-08 | 4,53E-06 | Zinc Finger CCCH-Type Containing, Antiviral 1 Like                 |
| XXYL1     | 0,430700506 | 4,19E-08 | 4,59E-06 | Xyloside Xylosyltransferase 1                                      |
| THBS3     | 0,430431786 | 4,28E-08 | 4,68E-06 | Thrombospondin 3                                                   |
| DIRC3     | 0,430007545 | 4,42E-08 | 4,82E-06 | Disrupted In Renal Carcinoma 3                                     |
| PROSER3   | 0,429906459 | 4,46E-08 | 4,84E-06 | Proline And Serine Rich 3                                          |
| ZNF827    | 0,429198454 | 4,72E-08 | 5,11E-06 | Zinc Finger Protein 827                                            |
| RASGRF2   | 0,428928826 | 4,82E-08 | 5,20E-06 | Ras Protein Specific Guanine Nucleotide Releasing Factor 2         |
| ZNF362    | 0,428699916 | 4,91E-08 | 5,28E-06 | Zinc Finger Protein 362                                            |
| CMTM1     | 0,428613005 | 4,94E-08 | 5,30E-06 | CKLF Like MARVEL Transmembrane Domain Containing 1                 |
| CHST11    | 0,427810161 | 5,27E-08 | 5,63E-06 | Carbohydrate Sulfotransferase 11                                   |
| DLGAP4    | 0,427725039 | 5,30E-08 | 5,65E-06 | DLG Associated Protein 4                                           |
| GAN       | 0,427640642 | 5,34E-08 | 5,67E-06 | Gigaxonin                                                          |
| FGF11     | 0,427551039 | 5,38E-08 | 5,69E-06 | Fibroblast Growth Factor 11                                        |
| SPSB1     | 0,427403941 | 5,44E-08 | 5,74E-06 | SplA/Ryanodine Receptor Domain And SOCS Box Containing 1           |
| ZNF70     | 0,427369268 | 5,45E-08 | 5,74E-06 | Zinc Finger Protein 70                                             |
| ROR2      | 0,427138195 | 5,55E-08 | 5,82E-06 | Receptor Tyrosine Kinase Like Orphan Receptor 2                    |
| LINC01096 | 0,427117317 | 5,56E-08 | 5,82E-06 | Long Intergenic Non-Protein Coding RNA 1096                        |
| TMEM200C  | 0,427008688 | 5,61E-08 | 5,84E-06 | Transmembrane Protein 200C                                         |
| FGD1      | 0,427004219 | 5,61E-08 | 5,84E-06 | FYVE, RhoGEF And PH Domain Containing 1                            |
| GTF3C1    | 0,426621473 | 5,79E-08 | 6,00E-06 | General Transcription Factor IIIC Subunit 1                        |
| ST3GAL2   | 0,426104622 | 6,03E-08 | 6,23E-06 | ST3 Beta-Galactoside Alpha-2,3-Sialyltransferase 2                 |
| KLKP1     | 0,426013998 | 6,07E-08 | 6,24E-06 | Kallikrein Pseudogene 1                                            |
| RAI1      | 0,425996549 | 6,08E-08 | 6,24E-06 | Retinoic Acid Induced 1                                            |
| BICD1     | 0,425833415 | 6,16E-08 | 6,30E-06 | BICD Cargo Adaptor 1                                               |

|             |             |          |          |                                                        |
|-------------|-------------|----------|----------|--------------------------------------------------------|
| DCHS1       | 0,425721684 | 6,21E-08 | 6,34E-06 | Dachsous Cadherin-Related 1                            |
| LSM11       | 0,425654803 | 6,24E-08 | 6,35E-06 | LSM11, U7 Small Nuclear RNA Associated                 |
| SUPT7L      | 0,42557697  | 6,28E-08 | 6,36E-06 | SPT7 Like, STAGA Complex Gamma Subunit                 |
| OLFML2A     | 0,425572935 | 6,28E-08 | 6,36E-06 | Olfactomedin Like 2A                                   |
| S100PBP     | 0,425375422 | 6,38E-08 | 6,44E-06 | S100P Binding Protein                                  |
| KCND2       | 0,425064086 | 6,54E-08 | 6,58E-06 | Potassium Voltage-Gated Channel Subfamily D Member 2   |
| SLC38A7     | 0,424976493 | 6,59E-08 | 6,60E-06 | Solute Carrier Family 38 Member 7                      |
| CEP170      | 0,424874521 | 6,64E-08 | 6,63E-06 | Centrosomal Protein 170                                |
| CPZ         | 0,424805204 | 6,67E-08 | 6,65E-06 | Carboxypeptidase Z                                     |
| SMAD7       | 0,424767094 | 6,69E-08 | 6,65E-06 | SMAD Family Member 7                                   |
| DDX50P1     | 0,424330249 | 6,93E-08 | 6,86E-06 | DEAD-Box Helicase 50 Pseudogene 1                      |
| CDKL5       | 0,424293051 | 6,95E-08 | 6,86E-06 | Cyclin Dependent Kinase Like 5                         |
| PHC1P1      | 0,424199108 | 7,00E-08 | 6,89E-06 | Polyhomeotic Homolog 1 Pseudogene 1                    |
| NPC1        | 0,424042802 | 7,09E-08 | 6,96E-06 | NPC Intracellular Cholesterol Transporter 1            |
| MTMR2       | 0,423548743 | 7,36E-08 | 7,21E-06 | Myotubularin Related Protein 2                         |
| TAF6        | 0,423145541 | 7,60E-08 | 7,42E-06 | TATA-Box Binding Protein Associated Factor 6           |
| KCTD7       | 0,423005969 | 7,68E-08 | 7,47E-06 | Potassium Channel Tetramerization Domain Containing 7  |
| HOXB5       | 0,422993228 | 7,69E-08 | 7,47E-06 | Homeobox B5                                            |
| SYNC        | 0,422941119 | 7,72E-08 | 7,47E-06 | Syncoilin, Intermediate Filament Protein               |
| KERA        | 0,422005369 | 8,30E-08 | 8,02E-06 | Keratocan                                              |
| FAM168A     | 0,421762303 | 8,46E-08 | 8,15E-06 | Family With Sequence Similarity 168 Member A           |
| FLNA        | 0,421580342 | 8,58E-08 | 8,24E-06 | Filamin A                                              |
| NXN         | 0,420711708 | 9,18E-08 | 8,79E-06 | Nucleoredoxin                                          |
| RAB11FIP1P1 | 0,420555294 | 9,29E-08 | 8,87E-06 | RAB11 Family Interacting Protein 1 Pseudogene 1        |
| SOX4        | 0,419959744 | 9,73E-08 | 9,26E-06 | SRY-Box Transcription Factor 4                         |
| TGFB11      | 0,419744709 | 9,89E-08 | 9,39E-06 | Transforming Growth Factor Beta 1 Induced Transcript 1 |
| SLC11A1     | 0,41925229  | 1,03E-07 | 9,71E-06 | Solute Carrier Family 11 Member 1                      |
| COL6A1      | 0,419230542 | 1,03E-07 | 9,71E-06 | Collagen Type VI Alpha 1 Chain                         |
| ZFYVE1      | 0,41895519  | 1,05E-07 | 9,89E-06 | Zinc Finger FYVE-Type Containing 1                     |
| BCL9        | 0,418586604 | 1,08E-07 | 1,01E-05 | BCL9 Transcription Coactivator                         |
| TET3        | 0,418544541 | 1,08E-07 | 1,01E-05 | Tet Methylcytosine Dioxygenase 3                       |
| ZNF713      | 0,418517332 | 1,09E-07 | 1,01E-05 | Zinc Finger Protein 713                                |
| BGN         | 0,418419889 | 1,10E-07 | 1,02E-05 | Biglycan                                               |
| PACS1       | 0,418393984 | 1,10E-07 | 1,02E-05 | Phosphofurin Acidic Cluster Sorting Protein 1          |
| NKAIN4      | 0,418116081 | 1,12E-07 | 1,04E-05 | Sodium/Potassium Transporting ATPase Interacting 4     |
| VCL         | 0,417643603 | 1,16E-07 | 1,07E-05 | Vinculin                                               |
| PHLDB1      | 0,417339269 | 1,19E-07 | 1,09E-05 | Pleckstrin Homology Like Domain Family B Member 1      |
| DIP2C       | 0,417309163 | 1,19E-07 | 1,09E-05 | Disco Interacting Protein 2 Homolog C                  |
| NPHP3       | 0,417247449 | 1,20E-07 | 1,10E-05 | Nephrocystin 3                                         |
| ST6GAL2     | 0,417150297 | 1,21E-07 | 1,10E-05 | ST6 Beta-Galactoside Alpha-2,6-Sialyltransferase 2     |
| WNT5A       | 0,417083686 | 1,21E-07 | 1,10E-05 | Wnt Family Member 5A                                   |
| GGCX        | 0,417073185 | 1,21E-07 | 1,10E-05 | Gamma-Glutamyl Carboxylase                             |
| COL6A2      | 0,417063563 | 1,22E-07 | 1,10E-05 | Collagen Type VI Alpha 2 Chain                         |
| CD70        | 0,417050083 | 1,22E-07 | 1,10E-05 | CD70 Molecule                                          |
| CORIN       | 0,416981483 | 1,22E-07 | 1,10E-05 | Corin, Serine Peptidase                                |
| SUSD6       | 0,416848189 | 1,24E-07 | 1,11E-05 | Sushi Domain Containing 6                              |

|            |             |          |          |                                                             |
|------------|-------------|----------|----------|-------------------------------------------------------------|
| FIBIN      | 0,416586817 | 1,26E-07 | 1,13E-05 | Fin Bud Initiation Factor Homolog                           |
| FGF1       | 0,416565357 | 1,26E-07 | 1,13E-05 | Fibroblast Growth Factor 1                                  |
| STRA6      | 0,416366159 | 1,28E-07 | 1,14E-05 | Stimulated By Retinoic Acid 6                               |
| ACAD11     | 0,416250487 | 1,29E-07 | 1,15E-05 | Acyl-CoA Dehydrogenase Family Member 11                     |
| SLC4A3     | 0,416188291 | 1,30E-07 | 1,15E-05 | Solute Carrier Family 4 Member 3                            |
| MAP4K5     | 0,415892468 | 1,33E-07 | 1,18E-05 | Mitogen-Activated Protein Kinase Kinase Kinase Kinase 5     |
| PRKD1      | 0,41575972  | 1,34E-07 | 1,18E-05 | Protein Kinase D1                                           |
| MEGF6      | 0,41569179  | 1,35E-07 | 1,19E-05 | Multiple EGF Like Domains 6                                 |
| ANGPTL2    | 0,41534124  | 1,39E-07 | 1,22E-05 | Angiopoietin Like 2                                         |
| TRIM6      | 0,415146564 | 1,41E-07 | 1,23E-05 | Tripartite Motif Containing 6                               |
| IGLON5     | 0,414941951 | 1,43E-07 | 1,25E-05 | IgLON Family Member 5                                       |
| SULF2      | 0,414748071 | 1,45E-07 | 1,26E-05 | Sulfatase 2                                                 |
| ATP1B3-AS1 | 0,41425368  | 1,51E-07 | 1,31E-05 | ATP1B3 Antisense RNA 1                                      |
| HOXA3      | 0,414216162 | 1,51E-07 | 1,31E-05 | Homeobox A3                                                 |
| SS18L1     | 0,413945986 | 1,54E-07 | 1,33E-05 | SS18L1 Subunit Of BAF Chromatin Remodeling Complex          |
| ANKIB1     | 0,413941229 | 1,54E-07 | 1,33E-05 | Ankyrin Repeat And IBR Domain Containing 1                  |
| NCOR2      | 0,413257733 | 1,62E-07 | 1,39E-05 | Nuclear Receptor Corepressor 2                              |
| ZSWIM8     | 0,413246792 | 1,62E-07 | 1,39E-05 | Zinc Finger SWIM-Type Containing 8                          |
| XKR5       | 0,412397193 | 1,73E-07 | 1,48E-05 | XK Related 5                                                |
| NINL       | 0,412364121 | 1,74E-07 | 1,48E-05 | Ninein Like                                                 |
| ODF2L      | 0,412331838 | 1,74E-07 | 1,48E-05 | Outer Dense Fiber Of Sperm Tails 2 Like                     |
| ACTN1      | 0,411869838 | 1,80E-07 | 1,53E-05 | Actinin Alpha 1                                             |
| LIMS1-AS1  | 0,411725172 | 1,82E-07 | 1,54E-05 | LIMS1 Antisense RNA 1                                       |
| RASAL2-AS1 | 0,411679228 | 1,83E-07 | 1,54E-05 | RASAL2 Antisense RNA 1                                      |
| SRGAP2     | 0,411532378 | 1,85E-07 | 1,55E-05 | SLIT-ROBO Rho GTPase Activating Protein 2                   |
| NETO1      | 0,411348845 | 1,87E-07 | 1,57E-05 | Neuropilin And Tolloid Like 1                               |
| MIR1254-1  | 0,411251367 | 1,89E-07 | 1,57E-05 | MicroRNA 1254-1                                             |
| ZNF841     | 0,411213731 | 1,89E-07 | 1,57E-05 | Zinc Finger Protein 841                                     |
| SEPT8      | 0,411207222 | 1,89E-07 | 1,57E-05 | Septin 8                                                    |
| EXOC7      | 0,411207204 | 1,89E-07 | 1,57E-05 | Exocyst Complex Component 7                                 |
| SYNDIG1    | 0,411114713 | 1,91E-07 | 1,58E-05 | Synapse Differentiation Inducing 1                          |
| SNCAIP     | 0,410939044 | 1,93E-07 | 1,60E-05 | Synuclein Alpha Interacting Protein                         |
| ADAMTS2    | 0,410690984 | 1,97E-07 | 1,62E-05 | ADAM Metallopeptidase With Thrombospondin Type 1 Motif 2    |
| DMTF1      | 0,410628636 | 1,98E-07 | 1,63E-05 | Cyclin D Binding Myb Like Transcription Factor 1            |
| UBE2D3P3   | 0,410081914 | 2,06E-07 | 1,69E-05 | Ubiquitin Conjugating Enzyme E2 D3 Pseudogene 3             |
| EMILIN1    | 0,410055328 | 2,06E-07 | 1,69E-05 | Elastin Microfibril Interfacer 1                            |
| CERCAM     | 0,40994481  | 2,08E-07 | 1,70E-05 | Cerebral Endothelial Cell Adhesion Molecule                 |
| TSPAN9     | 0,409807266 | 2,10E-07 | 1,71E-05 | Tetraspanin 9                                               |
| SALL1      | 0,409685101 | 2,12E-07 | 1,72E-05 | Spalt Like Transcription Factor 1                           |
| KDM5B      | 0,409562295 | 2,14E-07 | 1,73E-05 | Lysine Demethylase 5B                                       |
| PLEKHH2    | 0,409554027 | 2,14E-07 | 1,73E-05 | Pleckstrin Homology, MyTH4 And FERM Domain Containing H2    |
| HPS3       | 0,408873799 | 2,25E-07 | 1,82E-05 | HPS3 Biogenesis Of Lysosomal Organelles Complex 2 Subunit 1 |
| MYOF       | 0,408817204 | 2,26E-07 | 1,82E-05 | Myoferlin                                                   |
| RUSC2      | 0,408740961 | 2,28E-07 | 1,83E-05 | RUN And SH3 Domain Containing 2                             |
| TP53BP1    | 0,408475851 | 2,32E-07 | 1,86E-05 | Tumor Protein P53 Binding Protein 1                         |
| PXDNL      | 0,408420107 | 2,33E-07 | 1,86E-05 | Peroxidasin Like                                            |



|           |             |          |          |                                                                      |
|-----------|-------------|----------|----------|----------------------------------------------------------------------|
| MMP2      | 0,408236384 | 2,36E-07 | 1,88E-05 | Matrix Metallopeptidase 2                                            |
| EDIL3     | 0,408225755 | 2,37E-07 | 1,88E-05 | EGF Like Repeats And Discoidin Domains 3                             |
| CDC42EP3  | 0,408015303 | 2,40E-07 | 1,91E-05 | CDC42 Effector Protein 3                                             |
| FOXC1     | 0,407985796 | 2,41E-07 | 1,91E-05 | Forkhead Box K1                                                      |
| CTNNB1    | 0,407880133 | 2,43E-07 | 1,92E-05 | Catenin Beta 1                                                       |
| SOCS5     | 0,407789239 | 2,44E-07 | 1,92E-05 | Suppressor Of Cytokine Signaling 5                                   |
| RPSAP52   | 0,407654822 | 2,47E-07 | 1,94E-05 | Ribosomal Protein SA Pseudogene 52                                   |
| FUT11     | 0,407525287 | 2,49E-07 | 1,95E-05 | Fucosyltransferase 11                                                |
| VPS8      | 0,407311915 | 2,53E-07 | 1,98E-05 | VPS8 Subunit Of CORVET Complex                                       |
| PRRX1     | 0,407303071 | 2,53E-07 | 1,98E-05 | Paired Related Homeobox 1                                            |
| GRIP1     | 0,407248501 | 2,54E-07 | 1,98E-05 | Glutamate Receptor Interacting Protein 1                             |
| COL5A3    | 0,407221389 | 2,55E-07 | 1,98E-05 | Collagen Type V Alpha 3 Chain                                        |
| PDGFRB    | 0,407089232 | 2,57E-07 | 1,99E-05 | Platelet Derived Growth Factor Receptor Beta                         |
| HHIP      | 0,40702379  | 2,59E-07 | 2,00E-05 | Hedgehog Interacting Protein                                         |
| LAMA4     | 0,406853895 | 2,62E-07 | 2,02E-05 | Laminin Subunit Alpha 4                                              |
| AXL       | 0,406848779 | 2,62E-07 | 2,02E-05 | AXL Receptor Tyrosine Kinase                                         |
| FZD6      | 0,406820294 | 2,63E-07 | 2,02E-05 | Frizzled Class Receptor 6                                            |
| PLA2R1    | 0,406731667 | 2,64E-07 | 2,02E-05 | Phospholipase A2 Receptor 1                                          |
| SPIN1     | 0,406578873 | 2,67E-07 | 2,04E-05 | Spindlin 1                                                           |
| ERMN      | 0,406551429 | 2,68E-07 | 2,04E-05 | Ermin                                                                |
| NAV2      | 0,406529086 | 2,68E-07 | 2,04E-05 | Neuron Navigator 2                                                   |
| PLEKHA8   | 0,406445126 | 2,70E-07 | 2,05E-05 | Pleckstrin Homology Domain Containing A8                             |
| MARVELD1  | 0,405970575 | 2,80E-07 | 2,12E-05 | MARVEL Domain Containing 1                                           |
| FGD6      | 0,405714391 | 2,85E-07 | 2,15E-05 | FYVE, RhoGEF And PH Domain Containing 6                              |
| TNFRSF19  | 0,405591191 | 2,87E-07 | 2,17E-05 | TNF Receptor Superfamily Member 19                                   |
| SLCSA3    | 0,405157429 | 2,97E-07 | 2,23E-05 | Solute Carrier Family 5 Member 3                                     |
| RBMS1P1   | 0,405089351 | 2,98E-07 | 2,24E-05 | RNA Binding Motif Single Stranded Interacting Protein 1 Pseudogene 1 |
| N4BP1     | 0,405016187 | 3,00E-07 | 2,24E-05 | NEDD4 Binding Protein 1                                              |
| TFAP2A    | 0,405000558 | 3,00E-07 | 2,24E-05 | Transcription Factor AP-2 Alpha                                      |
| LIMK1     | 0,404314437 | 3,16E-07 | 2,35E-05 | LIM Domain Kinase 1                                                  |
| HMCN1     | 0,4042713   | 3,17E-07 | 2,36E-05 | Hemicentin 1                                                         |
| MFGE8     | 0,404206749 | 3,18E-07 | 2,36E-05 | Milk Fat Globule-EGF Factor 8 Protein                                |
| OPN3      | 0,404191172 | 3,19E-07 | 2,36E-05 | Opsin 3                                                              |
| TSPY26P   | 0,403577428 | 3,33E-07 | 2,46E-05 | Testis Specific Protein Y-Linked 26, Pseudogene                      |
| PCDHGA7   | 0,403222122 | 3,42E-07 | 2,52E-05 | Protocadherin Gamma Subfamily A, 7                                   |
| SHOX2     | 0,403133234 | 3,44E-07 | 2,53E-05 | Short Stature Homeobox 2                                             |
| SORCS2    | 0,402948961 | 3,49E-07 | 2,55E-05 | Sortilin Related VPS10 Domain Containing Receptor 2                  |
| LDB1      | 0,402948303 | 3,49E-07 | 2,55E-05 | LIM Domain Binding 1                                                 |
| XPO1      | 0,402671702 | 3,56E-07 | 2,60E-05 | Exportin 1                                                           |
| LINC01050 | 0,402577849 | 3,59E-07 | 2,61E-05 | Long Intergenic Non-Protein Coding RNA 1050                          |
| INHBA-AS1 | 0,402341047 | 3,65E-07 | 2,65E-05 | INHBA Antisense RNA 1                                                |
| LOX       | 0,402329397 | 3,65E-07 | 2,65E-05 | Lysyl Oxidase                                                        |
| AXIN2     | 0,402263596 | 3,67E-07 | 2,65E-05 | Axin 2                                                               |
| DLG4      | 0,402238402 | 3,68E-07 | 2,65E-05 | Discs Large MAGUK Scaffold Protein 4                                 |
| FLCN      | 0,402173576 | 3,69E-07 | 2,66E-05 | Folliculin                                                           |
| ITGA5     | 0,402072429 | 3,72E-07 | 2,67E-05 | Integrin Subunit Alpha 5                                             |

|           |              |          |          |                                                                           |
|-----------|--------------|----------|----------|---------------------------------------------------------------------------|
| PHTF2     | 0,401948153  | 3,75E-07 | 2,69E-05 | Putative Homeodomain Transcription Factor 2                               |
| NOD2      | 0,401922412  | 3,76E-07 | 2,69E-05 | Nucleotide Binding Oligomerization Domain Containing 2                    |
| RPS20P33  | 0,401604879  | 3,85E-07 | 2,75E-05 | Ribosomal Protein S20 Pseudogene 33                                       |
| HOXB2     | 0,401350622  | 3,92E-07 | 2,79E-05 | Homeobox B2                                                               |
| SLC39A13  | 0,400670584  | 4,12E-07 | 2,93E-05 | Solute Carrier Family 39 Member 13                                        |
| MIR1249   | 0,400534699  | 4,16E-07 | 2,95E-05 | MicroRNA 1249                                                             |
| NRBP1     | 0,40052878   | 4,16E-07 | 2,95E-05 | Nuclear Receptor Binding Protein 1                                        |
| RPL23AP64 | 0,400371627  | 4,21E-07 | 2,97E-05 | Ribosomal Protein L23a Pseudogene 64                                      |
| FBXO32    | 0,400031147  | 4,31E-07 | 3,04E-05 | F-Box Protein 32                                                          |
| MRPL54    | -0,404213848 | 3,18E-07 | 2,36E-05 | Mitochondrial Ribosomal Protein L54                                       |
| ATP2A3    | -0,41342115  | 1,60E-07 | 1,38E-05 | ATPase Sarcoplasmic/Endoplasmic Reticulum Ca <sup>2+</sup> Transporting 3 |

| <b>GSE85916</b>    |                                |                |                       |                                                            |
|--------------------|--------------------------------|----------------|-----------------------|------------------------------------------------------------|
| <b>Gene symbol</b> | <b>Correlation coefficient</b> | <b>p-value</b> | <b>p-value adjust</b> | <b>Gene description</b>                                    |
| COL8A1             | 0,432805778                    | 1,54E-15       | 1,54E-11              | Collagen Type VIII Alpha 1 Chain                           |
| KIF26B             | 0,419576696                    | 1,32E-14       | 8,76E-11              | Kinesin Family Member 26B                                  |
| TNFAIP6            | 0,414842211                    | 2,78E-14       | 1,38E-10              | TNF Alpha Induced Protein 6                                |
| UNC5B              | 0,411158434                    | 4,92E-14       | 1,65E-10              | Unc-5 Netrin Receptor B                                    |
| PTK7               | 0,411077309                    | 4,98E-14       | 1,65E-10              | Protein Tyrosine Kinase 7                                  |
| PPEF1              | 0,404628888                    | 1,33E-13       | 3,51E-10              | Protein Phosphatase With EF-Hand Domain 1                  |
| KANK4              | 0,404249067                    | 1,41E-13       | 3,51E-10              | KN Motif And Ankyrin Repeat Domains 4                      |
| MMP14              | 0,401239049                    | 2,22E-13       | 4,91E-10              | Matrix Metalloproteinase 14                                |
| PPAPDC1A           | 0,397679141                    | 3,76E-13       | 7,49E-10              | Phospholipid Phosphatase 4                                 |
| NOX4               | 0,396957525                    | 4,18E-13       | 7,57E-10              | NADPH Oxidase 4                                            |
| Septin 5           | 0,392711033                    | 7,77E-13       | 1,29E-09              | Septin 5                                                   |
| MFAP2              | 0,389270156                    | 1,28E-12       | 1,96E-09              | Microfibril Associated Protein 2                           |
| NUAK1              | 0,387681903                    | 1,60E-12       | 2,28E-09              | NUAK Family Kinase 1                                       |
| C7orf10            | 0,386552833                    | 1,88E-12       | 2,40E-09              | Succinyl-CoA:Glutarate-CoA Transferase                     |
| LOXL2              | 0,386365491                    | 1,93E-12       | 2,40E-09              | Lysyl Oxidase Like 2                                       |
| FGF1               | 0,385345026                    | 2,23E-12       | 2,62E-09              | Fibroblast Growth Factor 1                                 |
| PODNL1             | 0,384002633                    | 2,70E-12       | 2,98E-09              | Podocan Like 1                                             |
| ADC                | 0,381937005                    | 3,60E-12       | 3,78E-09              | Antizyme Inhibitor 2                                       |
| GPC1               | 0,37999502                     | 4,72E-12       | 4,70E-09              | Glypican 1                                                 |
| COL11A1            | 0,379029072                    | 5,40E-12       | 4,89E-09              | Collagen Type XI Alpha 1 Chain                             |
| CCNJL              | 0,377973115                    | 6,25E-12       | 5,24E-09              | Cyclin J Like                                              |
| BMP1               | 0,375432359                    | 8,85E-12       | 7,05E-09              | Bone Morphogenetic Protein 1                               |
| CERCAM             | 0,375152878                    | 9,20E-12       | 7,05E-09              | Cerebral Endothelial Cell Adhesion Molecule                |
| NKX3-2             | 0,374473663                    | 1,01E-11       | 7,45E-09              | NK3 Homeobox 2                                             |
| IGFL2              | 0,373467803                    | 1,16E-11       | 8,24E-09              | IGF Like Family Member 2                                   |
| FLJ22536           | 0,37282767                     | 1,26E-11       | 8,67E-09              | Cancer Susceptibility 15                                   |
| FLJ39632           | 0,371627161                    | 1,48E-11       | 9,81E-09              | Double Homeobox A Pseudogene 9                             |
| MEIS3              | 0,371424472                    | 1,53E-11       | 9,81E-09              | Meis Homeobox 3                                            |
| SLC12A4            | 0,370536852                    | 1,72E-11       | 1,04E-08              | Solute Carrier Family 12 Member 4                          |
| ITGA11             | 0,369245408                    | 2,04E-11       | 1,19E-08              | Integrin Subunit Alpha 11                                  |
| ADAMTS12           | 0,369077827                    | 2,09E-11       | 1,19E-08              | ADAM Metalloproteinase With Thrombospondin Type 1 Motif 12 |
| EFEMP2             | 0,367528384                    | 2,57E-11       | 1,42E-08              | EGF Containing Fibulin Extracellular Matrix Protein 2      |

|          |             |          |          |                                                            |
|----------|-------------|----------|----------|------------------------------------------------------------|
| PHLDA3   | 0,366691559 | 2,87E-11 | 1,55E-08 | Pleckstrin Homology Like Domain Family A Member 3          |
| GJB2     | 0,36538078  | 3,42E-11 | 1,79E-08 | Gap Junction Protein Beta 2                                |
| ANTXR1   | 0,362457246 | 5,02E-11 | 2,56E-08 | ANTXR Cell Adhesion Molecule 1                             |
| PXDN     | 0,360930226 | 6,13E-11 | 2,98E-08 | Peroxidasin                                                |
| ST6GAL2  | 0,359254021 | 7,61E-11 | 3,61E-08 | ST6 Beta-Galactoside Alpha-2,6-Sialyltransferase 2         |
| SCARF2   | 0,358731498 | 8,14E-11 | 3,66E-08 | Scavenger Receptor Class F Member 2                        |
| C5orf46  | 0,358619174 | 8,26E-11 | 3,66E-08 | Chromosome 5 Open Reading Frame 46                         |
| NTM      | 0,357933203 | 9,03E-11 | 3,91E-08 | Neurotrimin                                                |
| EMILIN1  | 0,357443378 | 9,61E-11 | 4,08E-08 | Elastin Microfibril Interfacer 1                           |
| ATP10A   | 0,357176781 | 9,95E-11 | 4,13E-08 | ATPase Phospholipid Transporting 10A                       |
| SHOX2    | 0,355485597 | 1,24E-10 | 4,92E-08 | Short Stature Homeobox 2                                   |
| APCDD1L  | 0,354090368 | 1,48E-10 | 5,62E-08 | APC Down-Regulated 1 Like                                  |
| MEX3A    | 0,354041248 | 1,48E-10 | 5,62E-08 | Mex-3 RNA Binding Family Member A                          |
| SC65     | 0,35398703  | 1,49E-10 | 5,62E-08 | Prolyl 3-Hydroxylase Family Member 4                       |
| LRRC15   | 0,351458214 | 2,06E-10 | 7,19E-08 | Leucine Rich Repeat Containing 15                          |
| BMP8A    | 0,351065681 | 2,16E-10 | 7,43E-08 | Bone Morphogenetic Protein 8a                              |
| C14orf37 | 0,350858797 | 2,22E-10 | 7,49E-08 | Armadillo Like Helical Domain Containing 4                 |
| OLFML2A  | 0,350413178 | 2,35E-10 | 7,64E-08 | Olfactomedin Like 2A                                       |
| COL5A2   | 0,35039715  | 2,35E-10 | 7,64E-08 | Collagen Type V Alpha 2 Chain                              |
| COL12A1  | 0,350306472 | 2,38E-10 | 7,64E-08 | Collagen Type XII Alpha 1 Chain                            |
| LEPREL2  | 0,348925294 | 2,83E-10 | 8,94E-08 | Prolyl 3-Hydroxylase 3                                     |
| TMEM132A | 0,348167811 | 3,11E-10 | 9,59E-08 | Transmembrane Protein 132A                                 |
| FNTB     | 0,348109838 | 3,13E-10 | 9,59E-08 | Farnesyltransferase, CAAX Box, Beta                        |
| LAMA4    | 0,347988065 | 3,18E-10 | 9,59E-08 | Laminin Subunit Alpha 4                                    |
| ADAM12   | 0,346433309 | 3,85E-10 | 1,15E-07 | ADAM Metallopeptidase Domain 12                            |
| RASGRF2  | 0,346174408 | 3,98E-10 | 1,16E-07 | Ras Protein Specific Guanine Nucleotide Releasing Factor 2 |
| ARSI     | 0,345952616 | 4,09E-10 | 1,18E-07 | Arylsulfatase Family Member I                              |
| DLG4     | 0,345323578 | 4,42E-10 | 1,24E-07 | Discs Large MAGUK Scaffold Protein 4                       |
| CMTM3    | 0,344814709 | 4,70E-10 | 1,28E-07 | CKLF Like MARVEL Transmembrane Domain Containing 3         |
| LRRC17   | 0,343628237 | 5,44E-10 | 1,45E-07 | Leucine Rich Repeat Containing 17                          |
| GPR162   | 0,343618904 | 5,44E-10 | 1,45E-07 | G Protein-Coupled Receptor 162                             |
| HOMER3   | 0,343489812 | 5,53E-10 | 1,45E-07 | Homer Scaffold Protein 3                                   |
| DCBLD1   | 0,34252292  | 6,22E-10 | 1,61E-07 | Discoidin, CUB And LCCL Domain Containing 1                |
| COL8A2   | 0,341615249 | 6,95E-10 | 1,75E-07 | Collagen Type VIII Alpha 2 Chain                           |
| TRIO     | 0,34119097  | 7,32E-10 | 1,82E-07 | Trio Rho Guanine Nucleotide Exchange Factor                |
| MRC2     | 0,3408348   | 7,64E-10 | 1,88E-07 | Mannose Receptor C Type 2                                  |
| WDR86    | 0,340624662 | 7,84E-10 | 1,90E-07 | WD Repeat Domain 86                                        |
| TRO      | 0,340511886 | 7,94E-10 | 1,91E-07 | Trophinin                                                  |
| COL6A2   | 0,340128312 | 8,32E-10 | 1,97E-07 | Collagen Type VI Alpha 2 Chain                             |
| FKBP9    | 0,338428427 | 1,02E-09 | 2,34E-07 | FKBP Prolyl Isomerase 9                                    |
| SAMD14   | 0,338186595 | 1,05E-09 | 2,38E-07 | Sterile Alpha Motif Domain Containing 14                   |
| COL5A3   | 0,337719255 | 1,11E-09 | 2,49E-07 | Collagen Type V Alpha 3 Chain                              |
| SSH1     | 0,337275079 | 1,17E-09 | 2,58E-07 | Slingshot Protein Phosphatase 1                            |
| SERPINH1 | 0,337221713 | 1,18E-09 | 2,58E-07 | Serpin Family H Member 1                                   |
| LEPRE1   | 0,336815292 | 1,24E-09 | 2,68E-07 | Prolyl 3-Hydroxylase 1                                     |
| RNF144A  | 0,336661861 | 1,26E-09 | 2,69E-07 | Ring Finger Protein 144A                                   |

|          |             |          |          |                                                          |
|----------|-------------|----------|----------|----------------------------------------------------------|
| MMP11    | 0,336447448 | 1,29E-09 | 2,72E-07 | Matrix Metallopeptidase 11                               |
| SOX11    | 0,33550045  | 1,45E-09 | 2,98E-07 | SRY-Box Transcription Factor 11                          |
| SORCS2   | 0,333341168 | 1,87E-09 | 3,81E-07 | Sortilin Related VPS10 Domain Containing Receptor 2      |
| PDLIM7   | 0,330558133 | 2,59E-09 | 5,22E-07 | PDZ And LIM Domain 7                                     |
| CLEC11A  | 0,330074141 | 2,75E-09 | 5,47E-07 | C-Type Lectin Domain Containing 11A                      |
| KAL1     | 0,329312049 | 3,00E-09 | 5,86E-07 | Anosmin 1                                                |
| PTPRD    | 0,329034154 | 3,10E-09 | 5,98E-07 | Protein Tyrosine Phosphatase Receptor Type D             |
| EFS      | 0,328966816 | 3,12E-09 | 5,98E-07 | Embryonal Fyn-Associated Substrate                       |
| NKD2     | 0,328284145 | 3,38E-09 | 6,42E-07 | NKD Inhibitor Of WNT Signaling Pathway 2                 |
| CHPF     | 0,328069975 | 3,47E-09 | 6,45E-07 | Chondroitin Polymerizing Factor                          |
| COL1A1   | 0,327683036 | 3,62E-09 | 6,69E-07 | Collagen Type I Alpha 1 Chain                            |
| SH3PXD2A | 0,327530804 | 3,69E-09 | 6,74E-07 | SH3 And PX Domains 2A                                    |
| CTHRC1   | 0,326079987 | 4,36E-09 | 7,83E-07 | Collagen Triple Helix Repeat Containing 1                |
| FGF11    | 0,325816175 | 4,49E-09 | 7,99E-07 | Fibroblast Growth Factor 11                              |
| GLIS2    | 0,325524615 | 4,65E-09 | 8,19E-07 | GLIS Family Zinc Finger 2                                |
| SRPX2    | 0,325359791 | 4,73E-09 | 8,28E-07 | Sushi Repeat Containing Protein X-Linked 2               |
| INPPL1   | 0,325204884 | 4,82E-09 | 8,28E-07 | Inositol Polyphosphate Phosphatase Like 1                |
| RAI14    | 0,324512843 | 5,22E-09 | 8,88E-07 | Retinoic Acid Induced 14                                 |
| CCDC8    | 0,324238815 | 5,38E-09 | 9,09E-07 | Coiled-Coil Domain Containing 8                          |
| CNIH3    | 0,322696662 | 6,42E-09 | 1,07E-06 | Cornichon Family AMPA Receptor Auxiliary Protein 3       |
| SYDE1    | 0,322077637 | 6,88E-09 | 1,14E-06 | Synapse Defective Rho GTPase Homolog 1                   |
| SPHK1    | 0,321946051 | 6,99E-09 | 1,15E-06 | Sphingosine Kinase 1                                     |
| NXN      | 0,321805366 | 7,10E-09 | 1,16E-06 | Nucleoredoxin                                            |
| NOTCH3   | 0,320766673 | 7,98E-09 | 1,27E-06 | Notch Receptor 3                                         |
| HS3ST3A1 | 0,32063183  | 8,10E-09 | 1,28E-06 | Heparan Sulfate-Glucosamine 3-Sulfotransferase 3A1       |
| ADAMTS7  | 0,320588124 | 8,14E-09 | 1,28E-06 | ADAM Metallopeptidase With Thrombospondin Type 1 Motif 7 |
| ITGB5    | 0,319951095 | 8,75E-09 | 1,36E-06 | Integrin Subunit Beta 5                                  |
| ARFGAP1  | 0,318319128 | 1,05E-08 | 1,62E-06 | ADP Ribosylation Factor GTPase Activating Protein 1      |
| NRP2     | 0,317247827 | 1,18E-08 | 1,81E-06 | Neuropilin 2                                             |
| C1QTNF3  | 0,31629929  | 1,32E-08 | 1,99E-06 | C1q And TNF Related 3                                    |
| NLGN2    | 0,315411185 | 1,45E-08 | 2,15E-06 | Neuroigin 2                                              |
| PLXNA1   | 0,31539405  | 1,45E-08 | 2,15E-06 | Plexin A1                                                |
| TGFB11   | 0,315146358 | 1,49E-08 | 2,19E-06 | Transforming Growth Factor Beta 1 Induced Transcript 1   |
| BTBD19   | 0,315049387 | 1,51E-08 | 2,20E-06 | BTB Domain Containing 19                                 |
| PLAU     | 0,31494878  | 1,53E-08 | 2,20E-06 | Plasminogen Activator, Urokinase                         |
| CDH13    | 0,313491142 | 1,79E-08 | 2,53E-06 | Cadherin 13                                              |
| C1QTNF6  | 0,313225354 | 1,85E-08 | 2,59E-06 | C1q And TNF Related 6                                    |
| CDH11    | 0,312797098 | 1,93E-08 | 2,70E-06 | Cadherin 11                                              |
| PPFIBP1  | 0,31076789  | 2,41E-08 | 3,32E-06 | PPFIA Binding Protein 1                                  |
| PRRX1    | 0,309807278 | 2,68E-08 | 3,63E-06 | Paired Related Homeobox 1                                |
| MAPK8IP3 | 0,309733064 | 2,70E-08 | 3,63E-06 | Mitogen-Activated Protein Kinase 8 Interacting Protein 3 |
| PTPDC1   | 0,309275454 | 2,84E-08 | 3,74E-06 | Protein Tyrosine Phosphatase Domain Containing 1         |
| SLC39A13 | 0,308957671 | 2,94E-08 | 3,85E-06 | Solute Carrier Family 39 Member 13                       |
| COL1A2   | 0,308649397 | 3,04E-08 | 3,90E-06 | Collagen Type I Alpha 2 Chain                            |
| SPOCD1   | 0,30799625  | 3,26E-08 | 4,13E-06 | SPOC Domain Containing 1                                 |
| DUOXA1   | 0,306435363 | 3,85E-08 | 4,76E-06 | Dual Oxidase Maturation Factor 1                         |

|          |              |          |          |                                                                                  |
|----------|--------------|----------|----------|----------------------------------------------------------------------------------|
| DTX3     | 0,305528496  | 4,24E-08 | 5,11E-06 | Deltex E3 Ubiquitin Ligase 3                                                     |
| FHOD3    | 0,305213573  | 4,38E-08 | 5,20E-06 | Formin Homology 2 Domain Containing 3                                            |
| FN1      | 0,3051991    | 4,39E-08 | 5,20E-06 | Fibronectin 1                                                                    |
| FSCN1    | 0,304849928  | 4,56E-08 | 5,31E-06 | Fascin Actin-Bundling Protein 1                                                  |
| ZNF469   | 0,302980072  | 5,56E-08 | 6,40E-06 | Zinc Finger Protein 469                                                          |
| GP1BB    | 0,302815703  | 5,65E-08 | 6,47E-06 | Glycoprotein Ib Platelet Subunit Beta                                            |
| FAM116B  | 0,302633018  | 5,76E-08 | 6,56E-06 | DENN Domain Containing 6B                                                        |
| PRRX2    | 0,302325529  | 5,95E-08 | 6,64E-06 | Paired Related Homeobox 2                                                        |
| ISLR     | 0,300846888  | 6,95E-08 | 7,61E-06 | Immunoglobulin Superfamily Containing Leucine Rich Repeat                        |
| HEY1     | 0,300548747  | 7,17E-08 | 7,73E-06 | Hes Related Family BHLH Transcription Factor With YRPW Motif 1                   |
| B4GALT7  | 0,300182683  | 7,45E-08 | 7,98E-06 | Beta-1,4-Galactosyltransferase 7                                                 |
| ZNF33A   | -0,300612867 | 7,12E-08 | 7,72E-06 | Zinc Finger Protein 33A                                                          |
| OMA1     | -0,30079303  | 6,99E-08 | 7,61E-06 | OMA1 Zinc Metallopeptidase                                                       |
| RPS6KA3  | -0,301339438 | 6,60E-08 | 7,27E-06 | Ribosomal Protein S6 Kinase A3                                                   |
| PTGER4   | -0,301797346 | 6,29E-08 | 6,97E-06 | Prostaglandin E Receptor 4                                                       |
| ABHD14B  | -0,302299369 | 5,97E-08 | 6,64E-06 | Abhydrolase Domain Containing 14B                                                |
| SNHG8    | -0,302344062 | 5,94E-08 | 6,64E-06 | Small Nucleolar RNA Host Gene 8                                                  |
| RPS6KA1  | -0,3024153   | 5,90E-08 | 6,64E-06 | Ribosomal Protein S6 Kinase A1                                                   |
| CD74     | -0,304387976 | 4,79E-08 | 5,55E-06 | CD74 Molecule                                                                    |
| RFX5     | -0,305005302 | 4,48E-08 | 5,25E-06 | Regulatory Factor X5                                                             |
| AMD1     | -0,305161937 | 4,41E-08 | 5,20E-06 | Adenosylmethionine Decarboxylase 1                                               |
| HNRNPA1  | -0,30548938  | 4,26E-08 | 5,11E-06 | Heterogeneous Nuclear Ribonucleoprotein A1                                       |
| KAT2B    | -0,305521261 | 4,24E-08 | 5,11E-06 | Lysine Acetyltransferase 2B                                                      |
| CMPK1    | -0,306007682 | 4,03E-08 | 4,93E-06 | Cytidine/Uridine Monophosphate Kinase 1                                          |
| RCSA1    | -0,306356789 | 3,88E-08 | 4,77E-06 | RCSA Domain Containing 1                                                         |
| ATP5O    | -0,307162303 | 3,56E-08 | 4,43E-06 | ATP Synthase Peripheral Stalk Subunit OSCP                                       |
| PNRC2    | -0,307680969 | 3,37E-08 | 4,22E-06 | Proline Rich Nuclear Receptor Coactivator 2                                      |
| CASP1    | -0,307892943 | 3,29E-08 | 4,15E-06 | Caspase 1                                                                        |
| ATP5I    | -0,308531634 | 3,07E-08 | 3,93E-06 | ATP Synthase Membrane Subunit E                                                  |
| SUCLG2   | -0,308775459 | 2,99E-08 | 3,87E-06 | Succinate-CoA Ligase GDP-Forming Beta Subunit                                    |
| AHCYL2   | -0,308888991 | 2,96E-08 | 3,85E-06 | Adenosylhomocysteinase Like 2                                                    |
| KLRB1    | -0,309504761 | 2,77E-08 | 3,68E-06 | Killer Cell Lectin Like Receptor B1                                              |
| ALDH3A2  | -0,309513868 | 2,76E-08 | 3,68E-06 | Aldehyde Dehydrogenase 3 Family Member A2                                        |
| PDE12    | -0,310345485 | 2,53E-08 | 3,45E-06 | Phosphodiesterase 12                                                             |
| SFPQ     | -0,312610183 | 1,97E-08 | 2,73E-06 | Splicing Factor Proline And Glutamine Rich                                       |
| ARHGEF3  | -0,314851527 | 1,54E-08 | 2,20E-06 | Rho Guanine Nucleotide Exchange Factor 3                                         |
| BRCC3    | -0,314855005 | 1,54E-08 | 2,20E-06 | BRCA1/BRCA2-Containing Complex Subunit 3                                         |
| IL6ST    | -0,315890481 | 1,38E-08 | 2,06E-06 | Interleukin 6 Signal Transducer                                                  |
| APPL1    | -0,317058116 | 1,21E-08 | 1,84E-06 | Adaptor Protein, Phosphotyrosine Interacting With PH Domain And Leucine Zipper 1 |
| GSPT1    | -0,320852309 | 7,90E-09 | 1,27E-06 | G1 To S Phase Transition 1                                                       |
| ANAPC16  | -0,320871327 | 7,89E-09 | 1,27E-06 | Anaphase Promoting Complex Subunit 16                                            |
| RPS28    | -0,325254533 | 4,79E-09 | 8,28E-07 | Ribosomal Protein S28                                                            |
| ACADM    | -0,3263636   | 4,22E-09 | 7,64E-07 | Acyl-CoA Dehydrogenase Medium Chain                                              |
| GIMAP4   | -0,328137878 | 3,44E-09 | 6,45E-07 | GTPase, IMAP Family Member 4                                                     |
| SOD1     | -0,32956924  | 2,91E-09 | 5,74E-07 | Superoxide Dismutase 1                                                           |
| C19orf43 | -0,335916253 | 1,38E-09 | 2,86E-07 | Telomerase RNA Component Interacting RNase                                       |

|         |              |          |          |                                                         |
|---------|--------------|----------|----------|---------------------------------------------------------|
| RPL11   | -0,336626181 | 1,27E-09 | 2,69E-07 | Ribosomal Protein L11                                   |
| OXNAD1  | -0,338413064 | 1,02E-09 | 2,34E-07 | Oxidoreductase NAD Binding Domain Containing 1          |
| MID1IP1 | -0,339678657 | 8,79E-10 | 2,06E-07 | MID1 Interacting Protein 1                              |
| ATPAF1  | -0,342164976 | 6,50E-10 | 1,66E-07 | ATP Synthase Mitochondrial F1 Complex Assembly Factor 1 |
| C6      | -0,345075903 | 4,55E-10 | 1,26E-07 | Complement C6                                           |
| HIPK2   | -0,345301718 | 4,43E-10 | 1,24E-07 | Homeodomain Interacting Protein Kinase 2                |
| EPB41   | -0,351513652 | 2,04E-10 | 7,19E-08 | Erythrocyte Membrane Protein Band 4.1                   |
| LYN     | -0,352511516 | 1,80E-10 | 6,53E-08 | LYN Proto-Oncogene, Src Family Tyrosine Kinase          |
| MAOA    | -0,353664177 | 1,56E-10 | 5,75E-08 | Monoamine Oxidase A                                     |
| HSDL2   | -0,355551641 | 1,22E-10 | 4,92E-08 | Hydroxysteroid Dehydrogenase Like 2                     |
| GSTK1   | -0,35861191  | 8,27E-11 | 3,66E-08 | Glutathione S-Transferase Kappa 1                       |
| MBNL3   | -0,362224591 | 5,17E-11 | 2,58E-08 | Muscleblind Like Splicing Regulator 3                   |
| RPL14   | -0,371086121 | 1,60E-11 | 9,94E-09 | Ribosomal Protein L14                                   |
| IQGAP2  | -0,377897675 | 6,31E-12 | 5,24E-09 | IQ Motif Containing GTPase Activating Protein 2         |
| C3orf23 | -0,379039121 | 5,39E-12 | 4,89E-09 | T Cell Activation Inhibitor, Mitochondrial              |

**Table S7. Univariate analyses of different pathways for overall survival in the ICGC cohort.**

| Pathways           | Univariate analysis |               |                      |          |
|--------------------|---------------------|---------------|----------------------|----------|
|                    | No. of patients     | No. of events | Hazard ratio (95%CI) | P-value* |
| <b>Stemness</b>    | 257                 | 153           | 0.96 (0.26 – 3.53)   | 0.96     |
| <b>Metabolic</b>   | 257                 | 153           | 0.96 (0.26 – 3.53)   | 0.96     |
| <b>Fibroblasts</b> | 257                 | 153           | 1.03 (0.85 – 1.24)   | 0.78     |
| <b>F-TBRS</b>      | 257                 | 153           | 1.439 (0.77 – 2.67)  | 0.25     |
| <b>TGFB CAF</b>    | 257                 | 153           | 1.03 (0.88 – 1.21)   | 0.72     |

\*Cox-proportional-hazard models used to estimate the association of the parameters with overall survival. Values of P<0.05 were considered statistically significant and all tests were two-sided.
